# Supplementary material for: Divergent WNT signaling and drug sensitivity profiles within hepatoblastoma tumors and organoids
Source: PubMed Central journal article supplement (PMC11579375; doi:10.1038/s41467-024-52757-w), 2024-11-20
Supplement: 41467_2024_52757_MOESM1_ESM.pdf [file 41467_2024_52757_MOESM1_ESM.pdf]

**Supplementary Information**

**Divergent WNT Signaling and Drug Sensitivity Profiles within Hepatoblastoma Tumors  
and Organoids**

**Kliver, Lu *et al.***

## Supplementary Figures

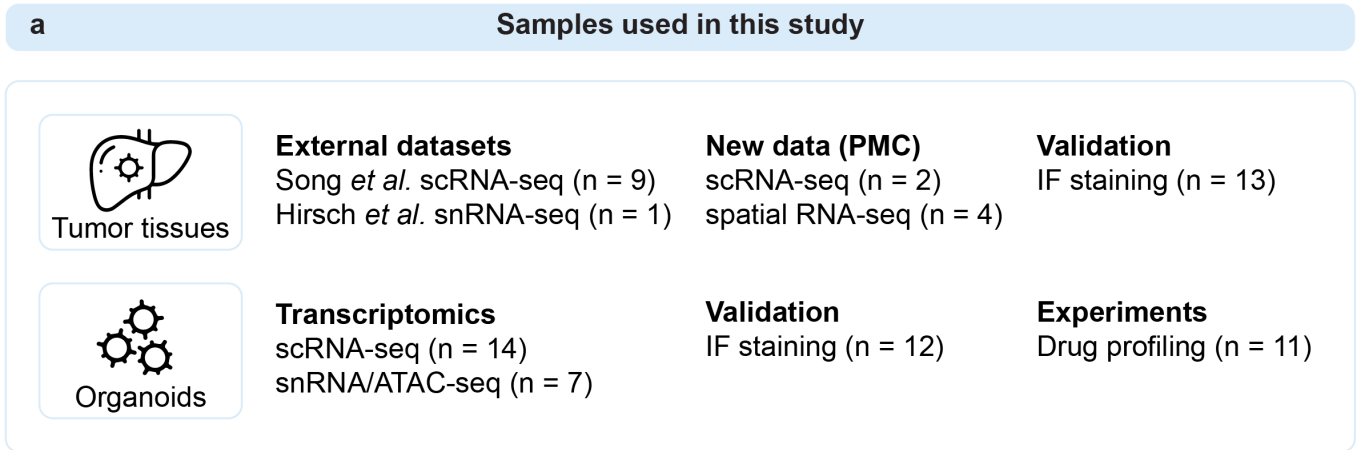

**Supplementary Figure 1. Single-cell hepatoblastoma processing and analysis.**

(a) Overview of number of samples per analyses used in the study.



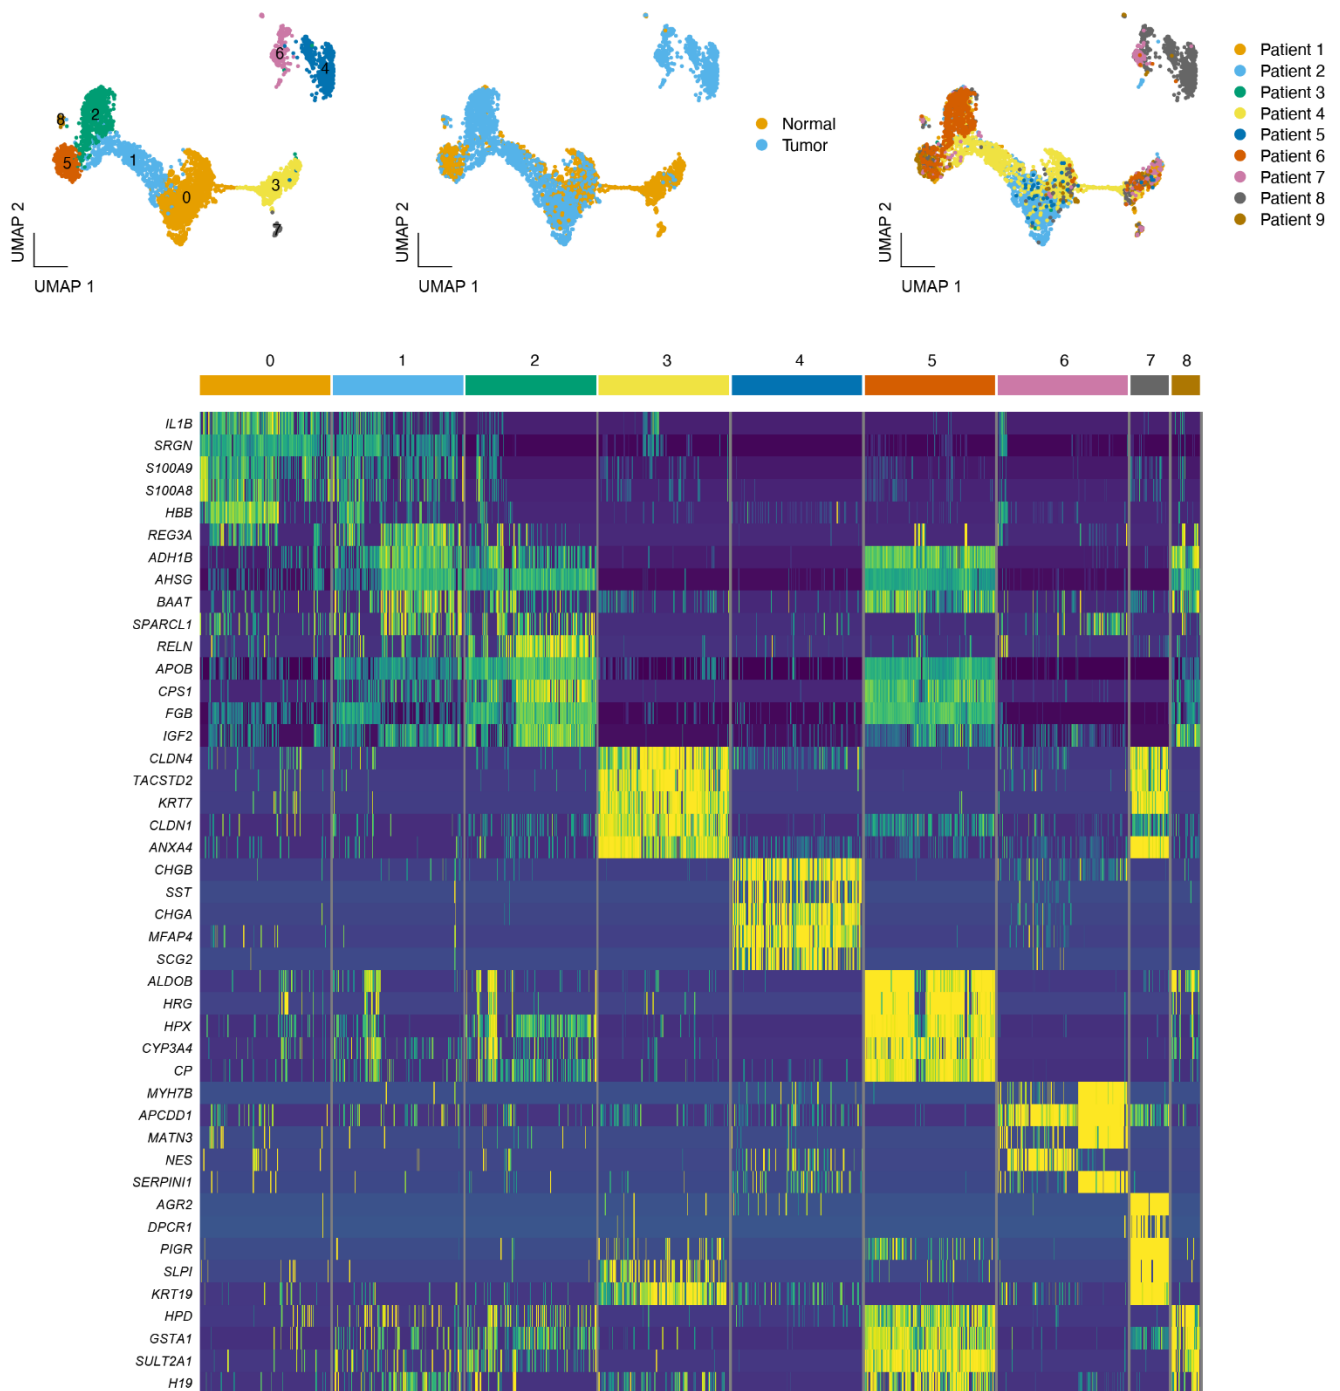

(b) UMAP showing the full dataset from Song *et al.* after data filtering, normalization, scaling, DecontX, fastMNN batch correction, dimensional reduction, and clustering, with a heatmap showing the top 5 differentially expressed markers per cluster (*previous page*). The epithelial normal and tumor clusters 4, 8, 11, 13 and 18 were subsetted and unbiased clustering was performed. UMAP showing the reprocessed subsetted clusters, with a heatmap showing the top 5 differentially expressed markers per cluster of the subsetted object (*this page*). We removed low-quality clusters likely contaminated with non-parenchymal cells, and the neuroendocrine cluster (4) for the final object. Clusters 2, 3, 5, 6, 7 and 8 were retained.

c

## Heatmap of differentially expressed genes

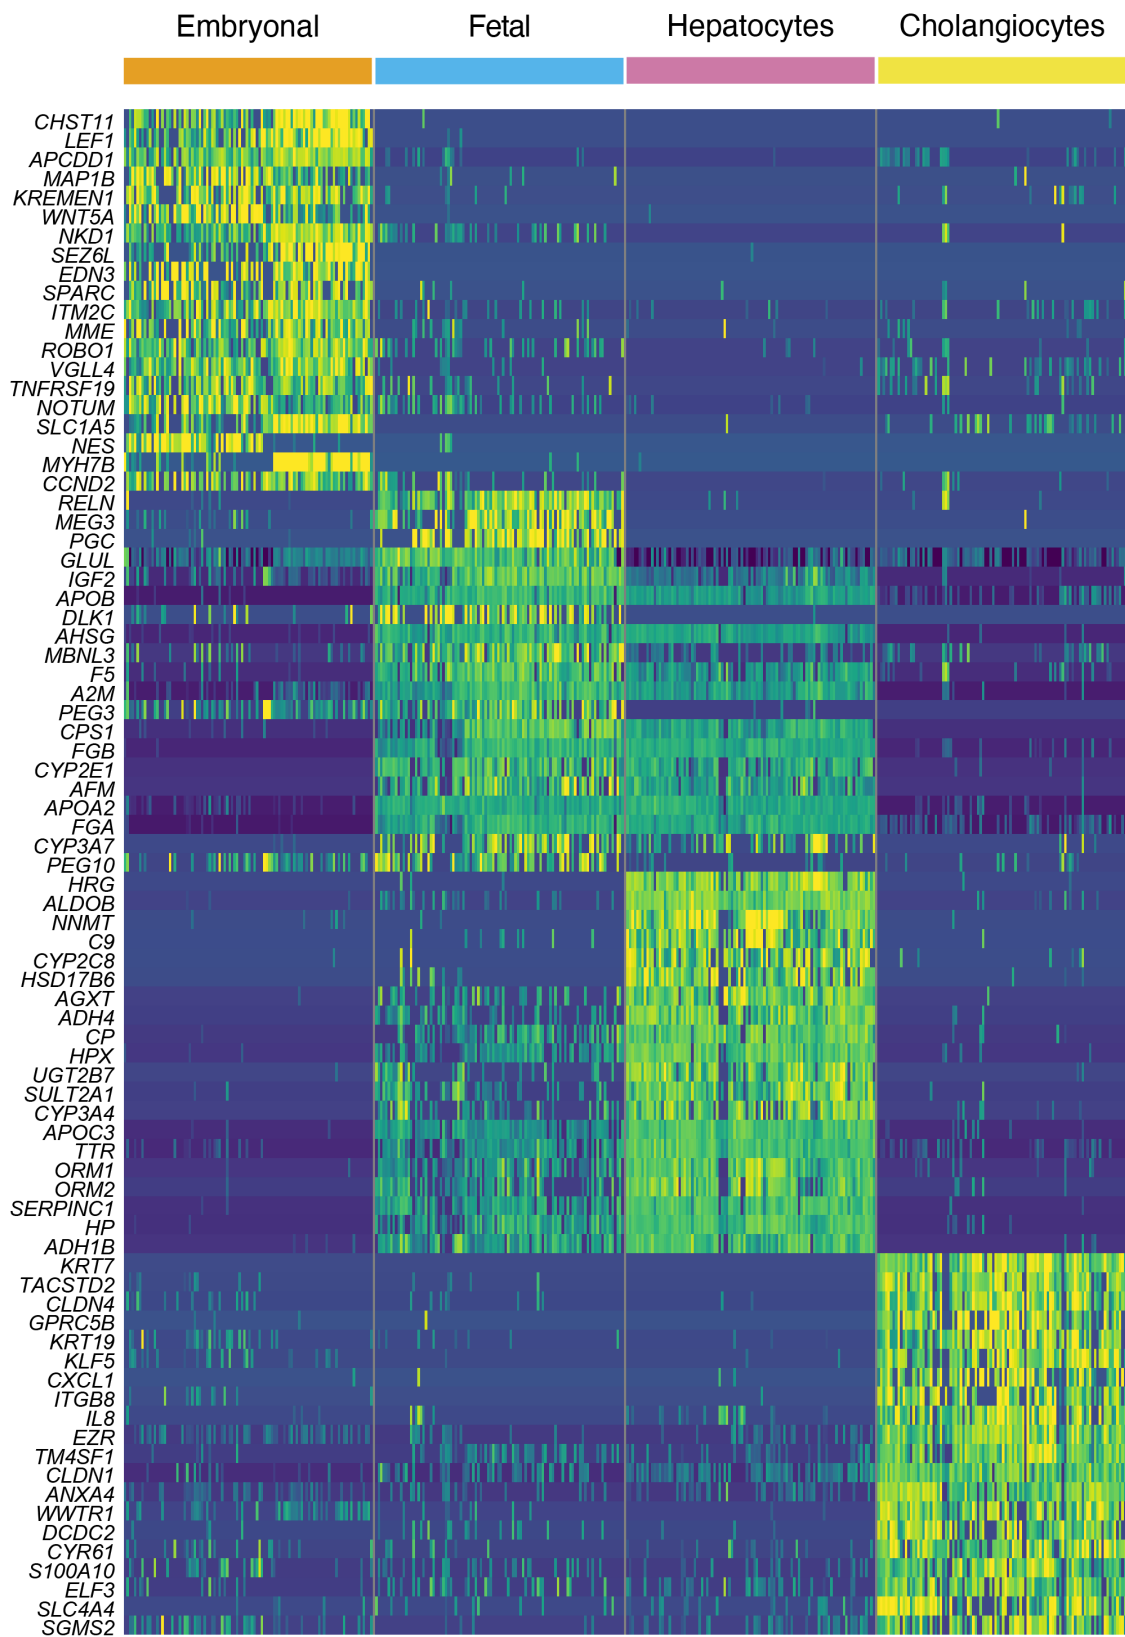

(c) Heatmap showing top differentially expressed genes of the final clusters.

**d** Differential gene expression between embryonal and fetal cells in other datasets

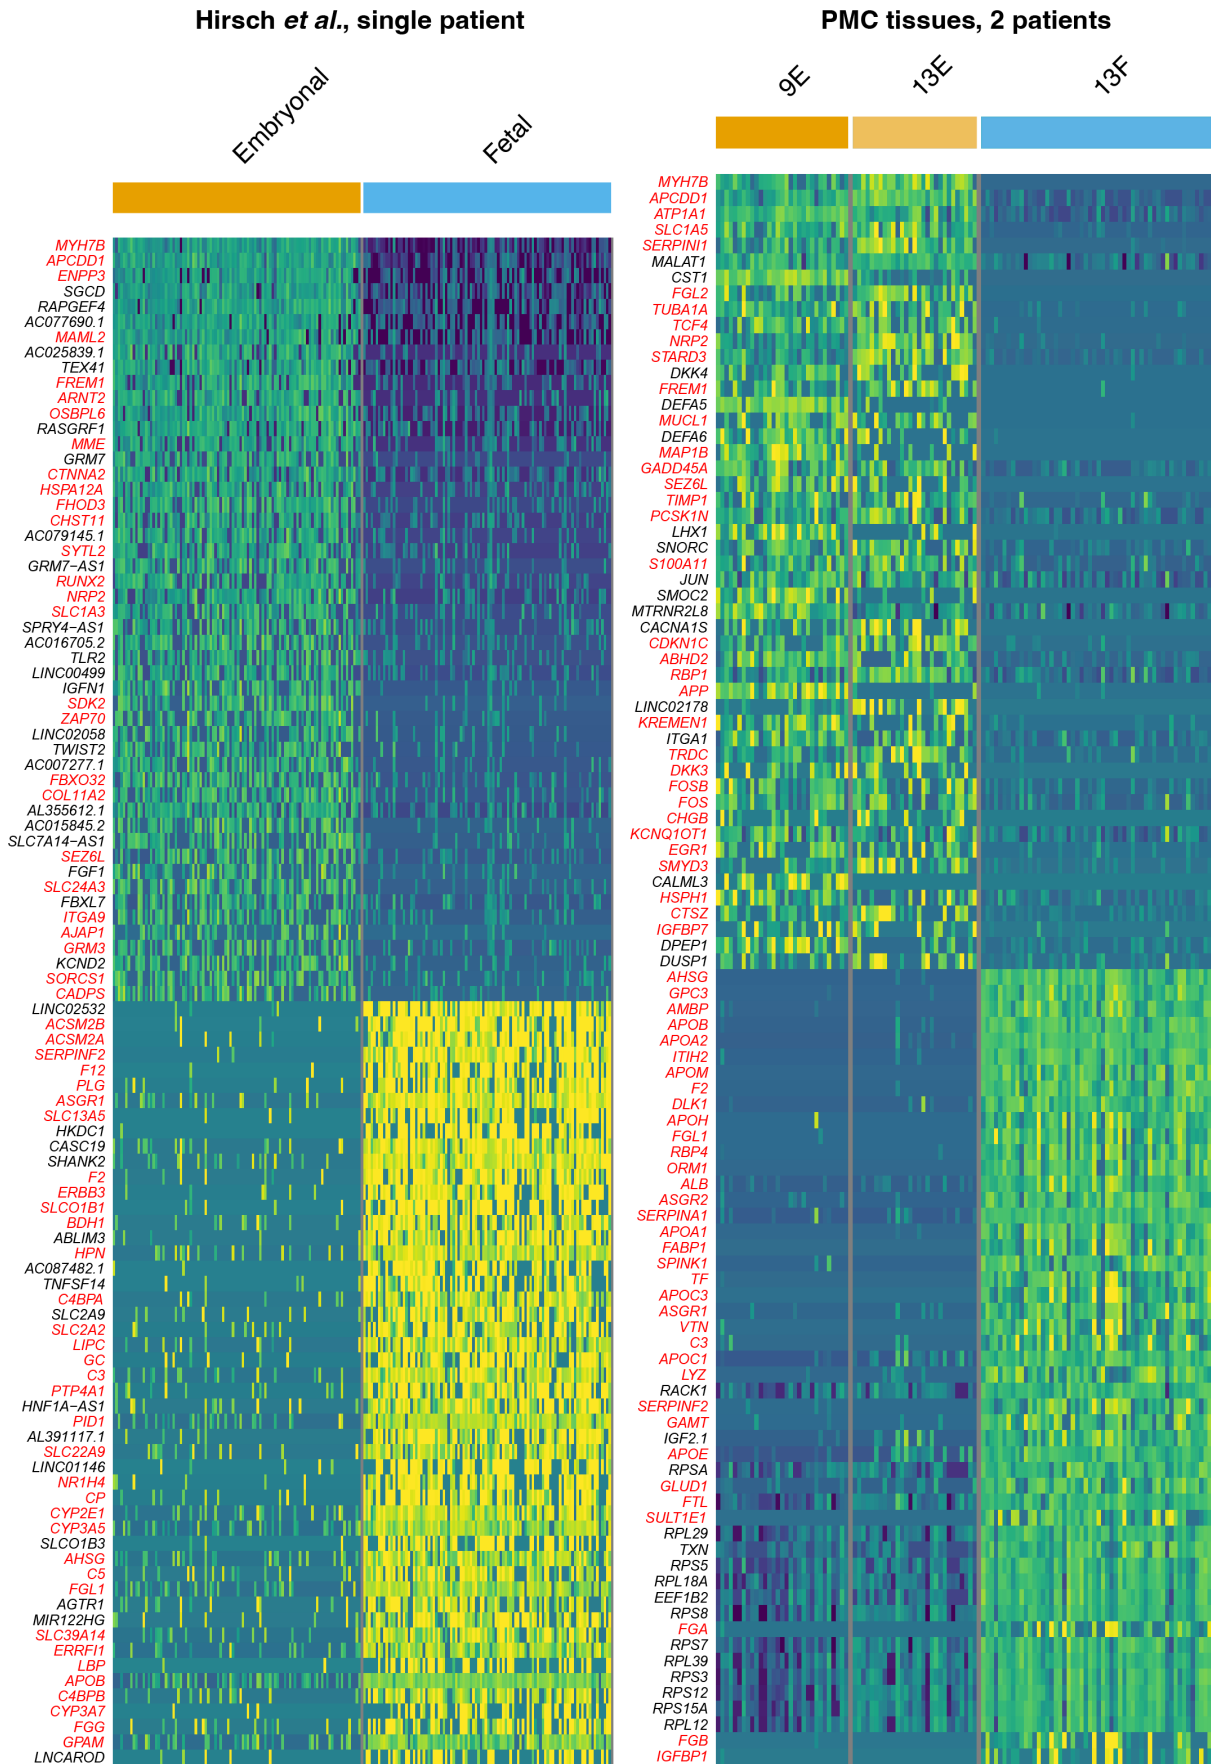

■ = Same markers as identified for this subtype in our Song reanalysis

(d) Heatmaps showing the top 50 differentially expressed gene for both the Hirsch *et al.* and PMC samples. Genes which overlap with the respective cluster in the Song *et al.* reanalysis are marked in red.

### e Overlapping genes Song *et al.*

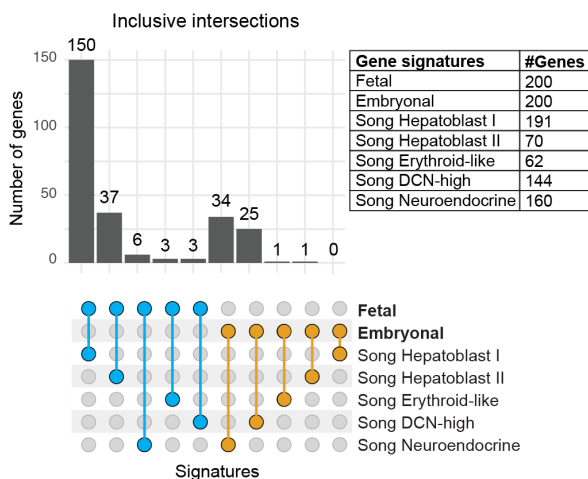

### f Signature scores Song *et al.*

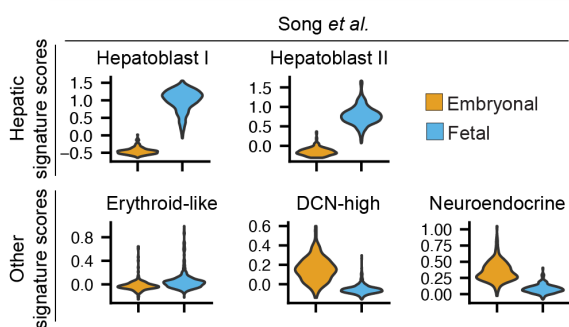

### g Additional hepatoblastoma signature scores

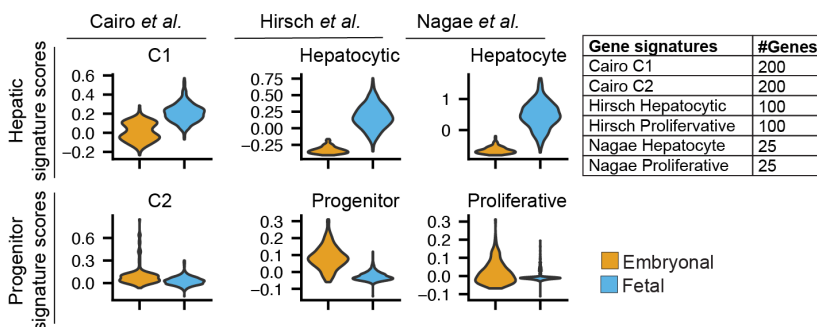

### h Correlation heatmap of hepatoblastoma signatures

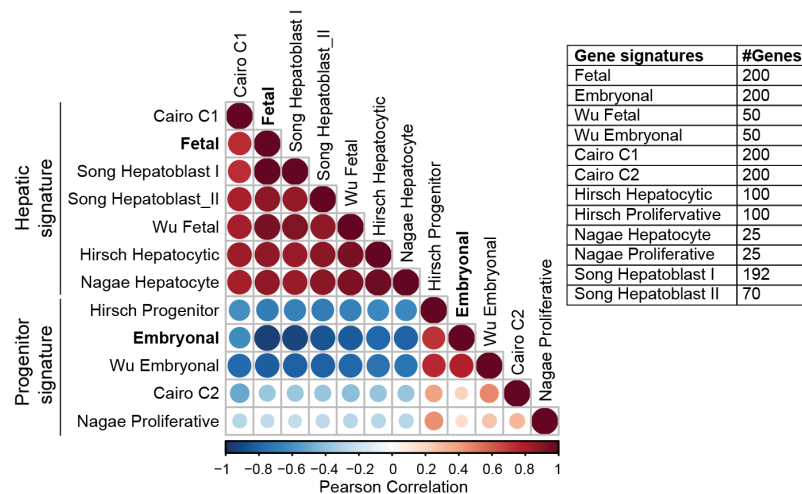

(e) Inclusive intersections between our gene signatures (top 200 DEGs) and the five single-cell RNA-sequencing tumor signatures described by Song *et al.*, visualized in an UpSet plot.

(f) Violin plot of tumor cell subsets showing scores of the different hepatoblastoma gene signatures from Song *et al.* (63-191 DEGs).

(g) Violin plot of tumor cell subsets showing scores of the different hepatoblastoma classifications based on gene signatures described by Cairo *et al.* (top 200 DEGs) and Hirsch *et al.* (top 100 DEGs), and Nagae *et al.* (top 25 DEGs).

(h) Correlation heatmap of the gene signature expression in tumor cell subset, grouped via complete linkage hierarchical clustering. The Pearson correlations between gene signatures were calculated using log-normalized gene expression values and z-scored to allow cross-signature comparisons. Only significant (adjusted  $p$ -value < 0.05) correlations are shown.

i

### Overlapping genes additional hepatoblastoma signatures

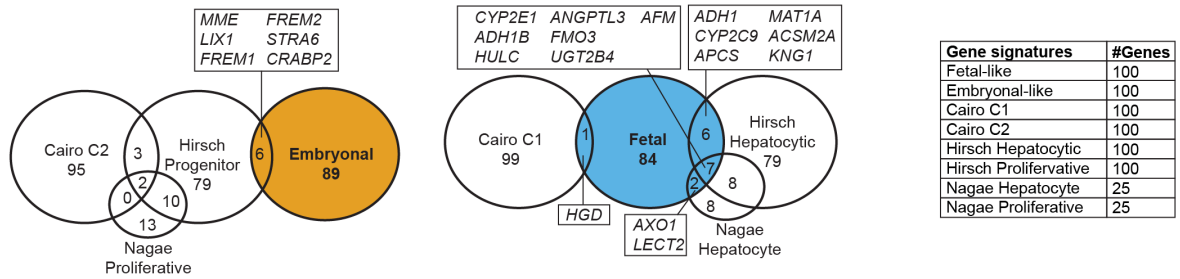

j

### Enrichment of general WNT genes

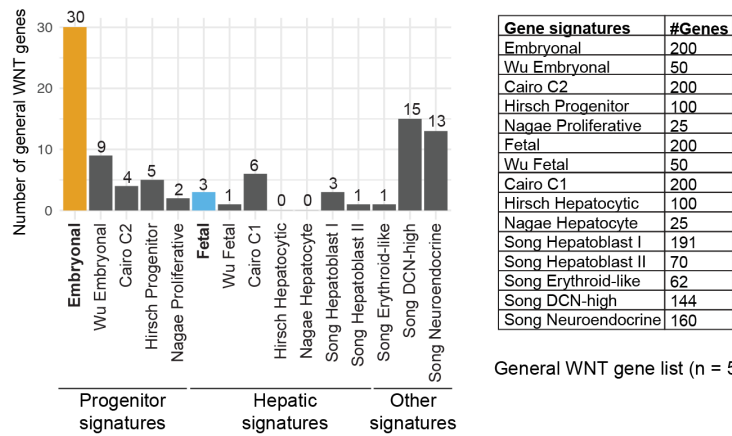

(i) Graphical representation of overlapping genes between the different transcriptomic hepatoblastoma signatures.

(j) Enrichment of general WNT genes in the different transcriptomic hepatoblastoma signatures. Full list of genes is shown in **Supp. Data 3**.



k

## Heatmap of differentially active SCENIC regulons

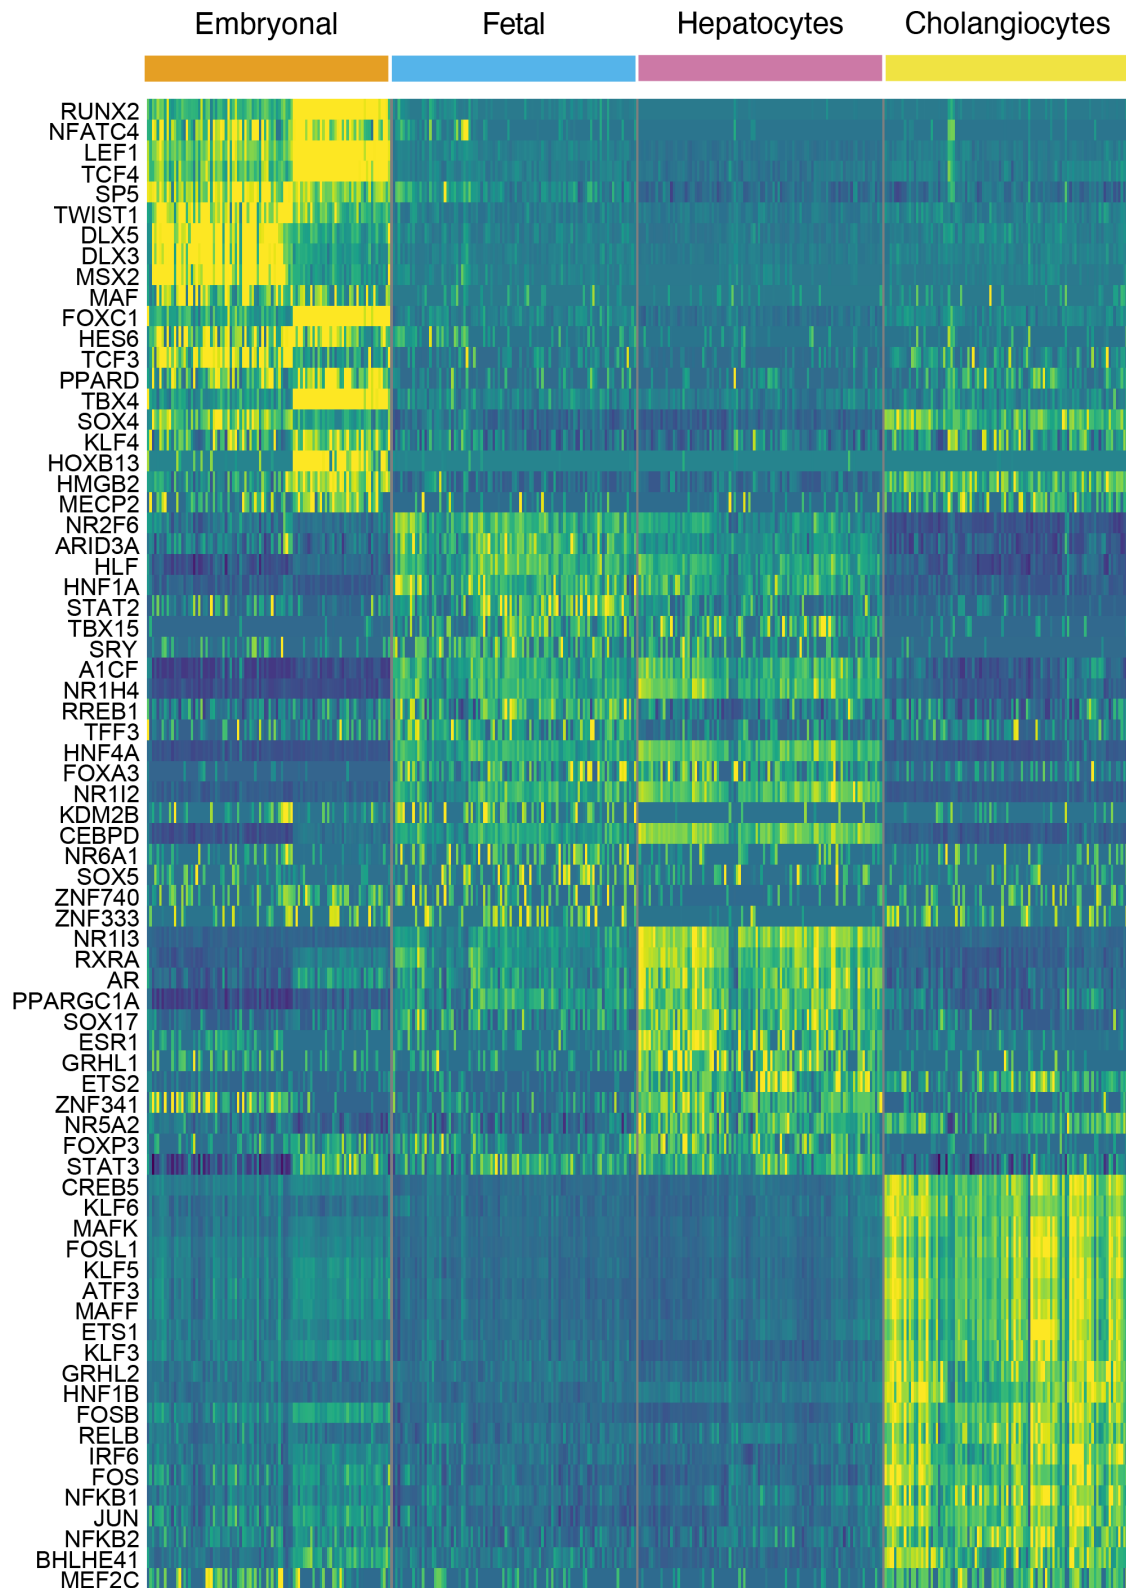

(k) Single-cell heatmap showing differentially active transcription factor regulons, using SCENIC, for each of the tumor clusters as well as normal hepatocytes and cholangiocytes.

I

Expression of selected markers in tissue, split by patient

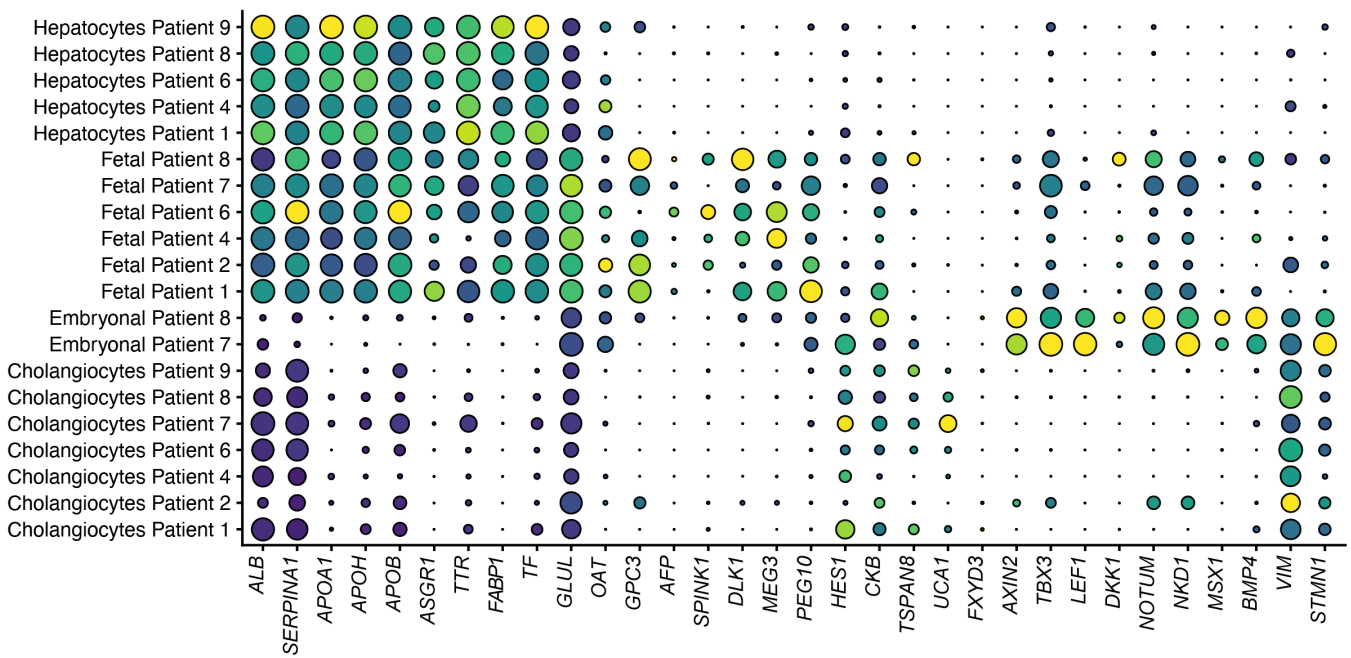

m

Regulon activity per cell type

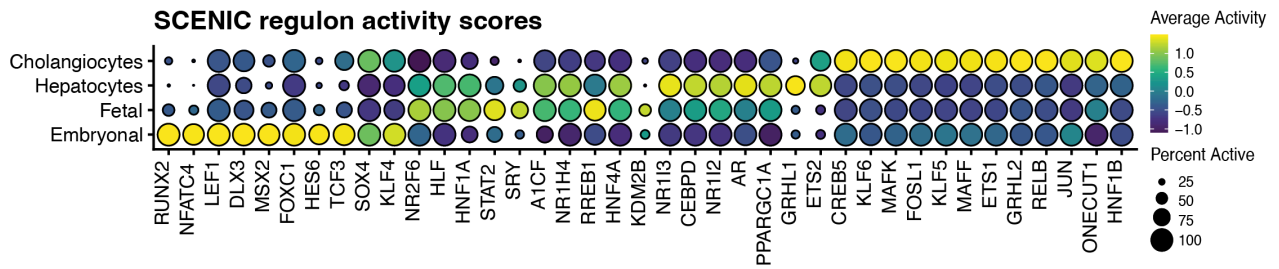

(l) Dot plot showing selected marker expression per cluster, per patient. Only populations with at least 10 cells are shown.

(m) Dot plot showing regulon activity per cell type.

a

## Spatial analysis PT2 adjacent normal

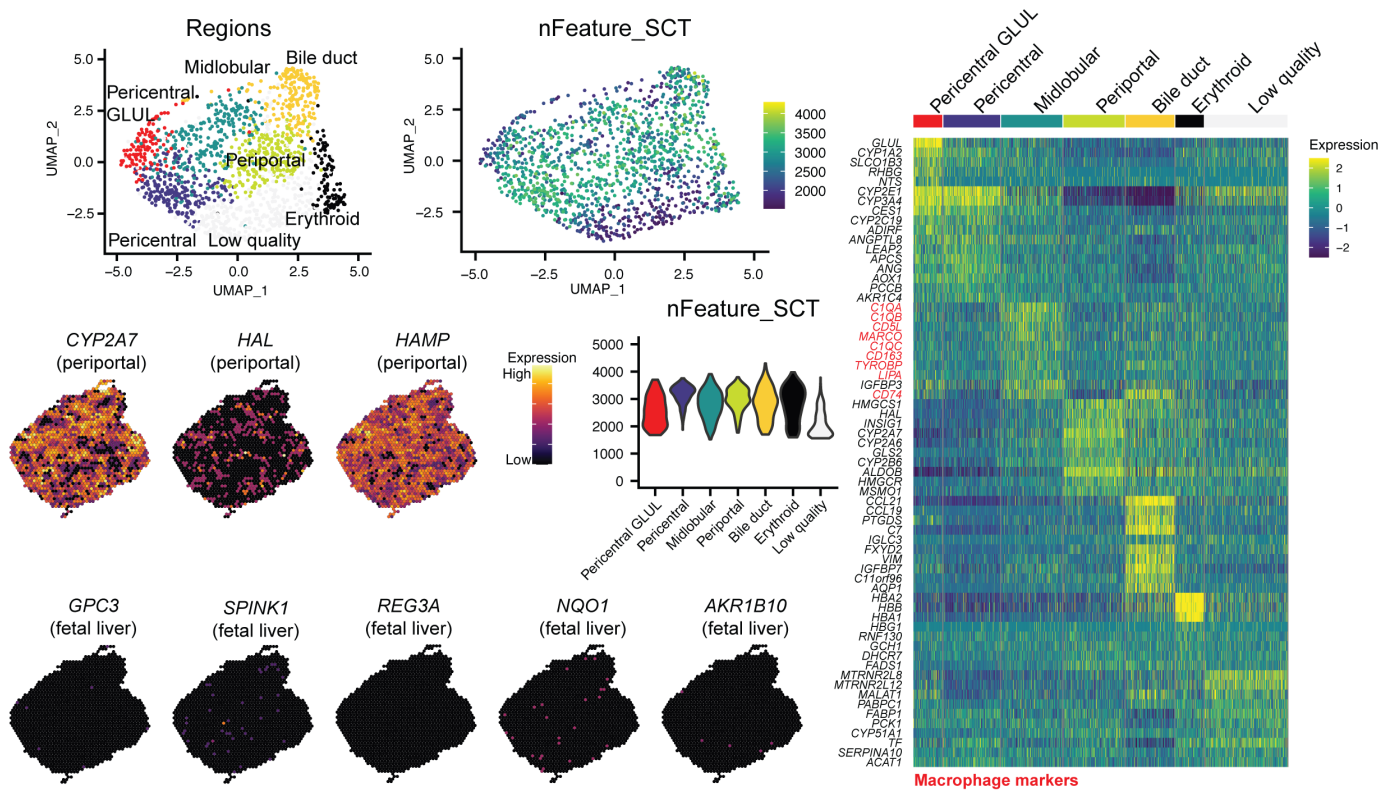

## Supplementary Figure 2. Spatial transcriptomic analysis of adjacent normal liver and four hepatoblastoma tissues.

For each section individually, we inspected the H&E stainings and performed: (1) unsupervised graph-based clustering, (2) quality control assessment (SCTransformed features per cluster/spot visualized in UMAP representation and violin plot), (3) differential gene expression analysis (heatmap visualizing the top 10 differentially expressed genes per cluster) and (4) marker gene expression (visualized in violin plots or spatial distribution).

(a) Distal normal liver tissue from patient PT2 identified *GLUL* pericentral, pericentral, midlobular, periportal and bile duct regions. Quality control identified one cluster, assigned as “Low quality” (“nFeatures\_SCT”<2000), which was excluded from further downstream analysis.

b

## Spatial analysis PT2 hepatoblastoma

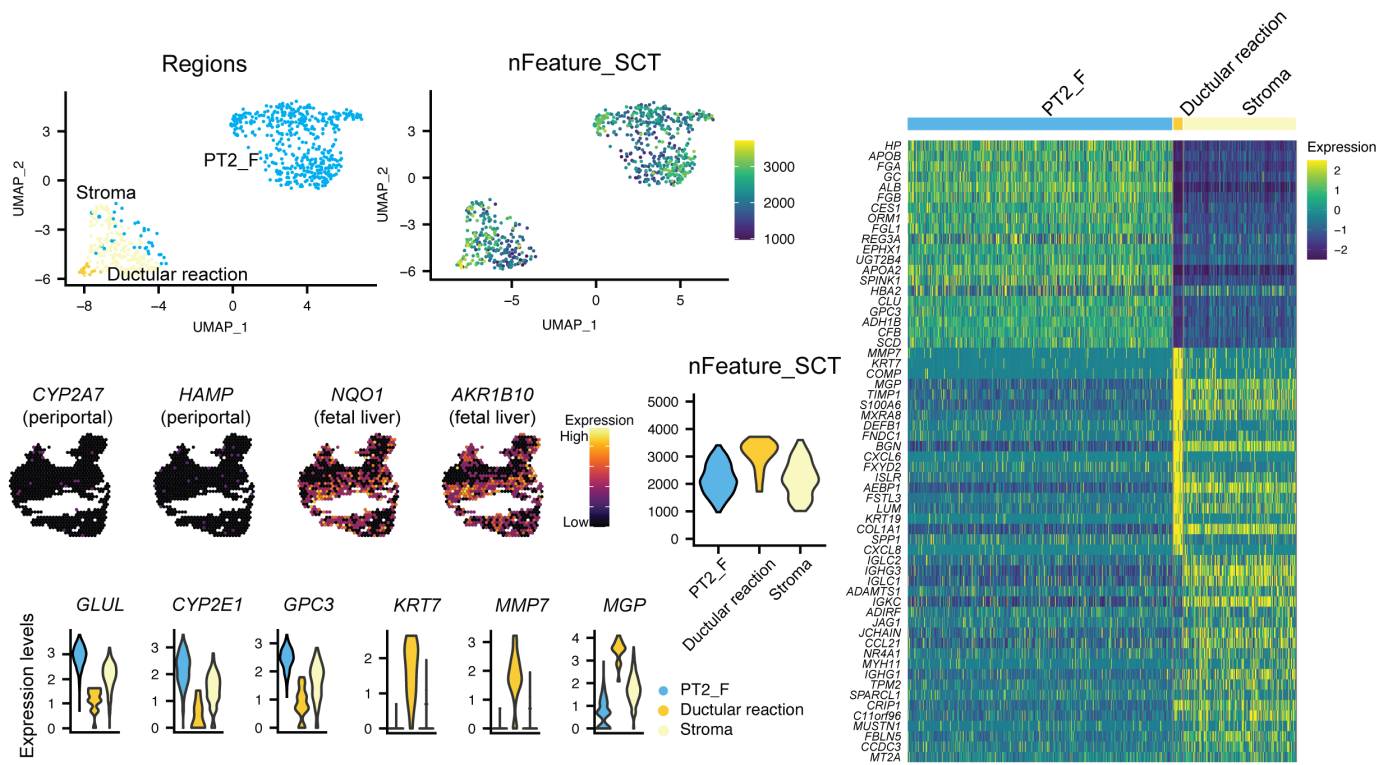

(b) The tumor of PT2 showed expressed of pericentral hepatocyte and fetal liver markers, but absence of periportal marker. Stromal regions expressed immune and endothelial markers (*CCL21*, *CCL19*, *MGP*). Expression of cholangiocyte markers indicates ductular reaction in the tumor stroma region.

c

## Spatial analysis PT2 adjacent normal vs tumor

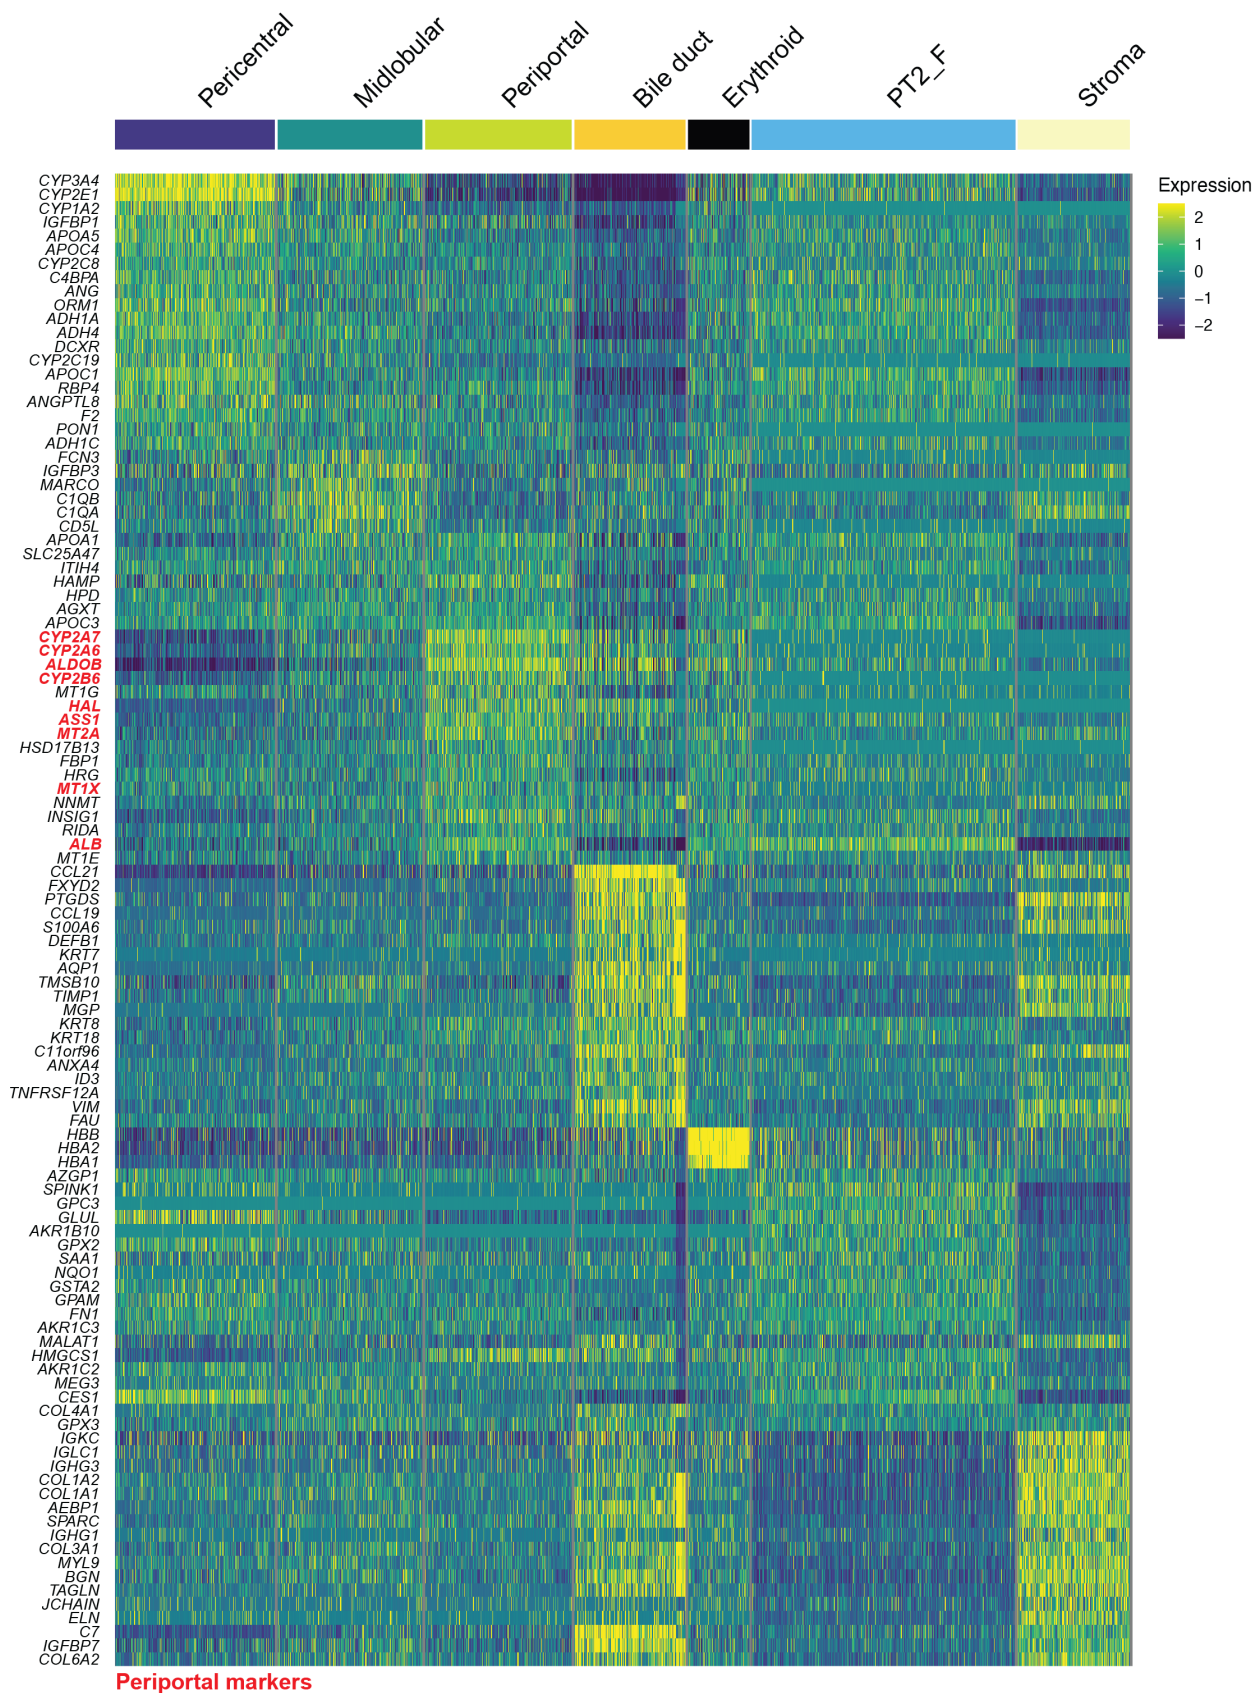

(c) Heatmap of differentially expressed genes between the clusters of the PT2 tumor and distal normal sections. Tumor spots expressed pericentral hepatocyte and fetal liver markers but showed reduced expression of periportal markers (marked in red).

### d Spatial analysis PT13 hepatoblastoma

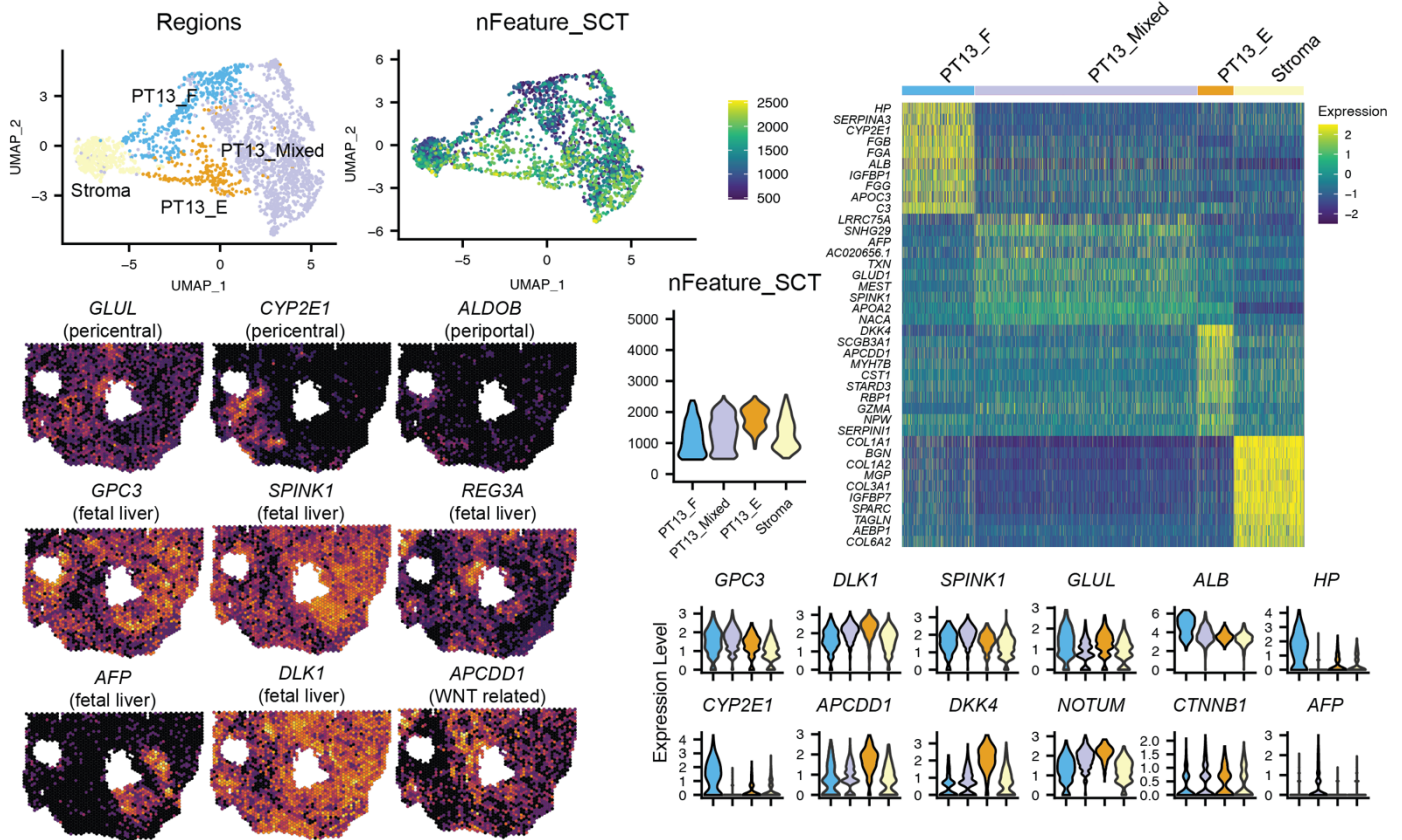

### e Spatial analysis PT16 hepatoblastoma

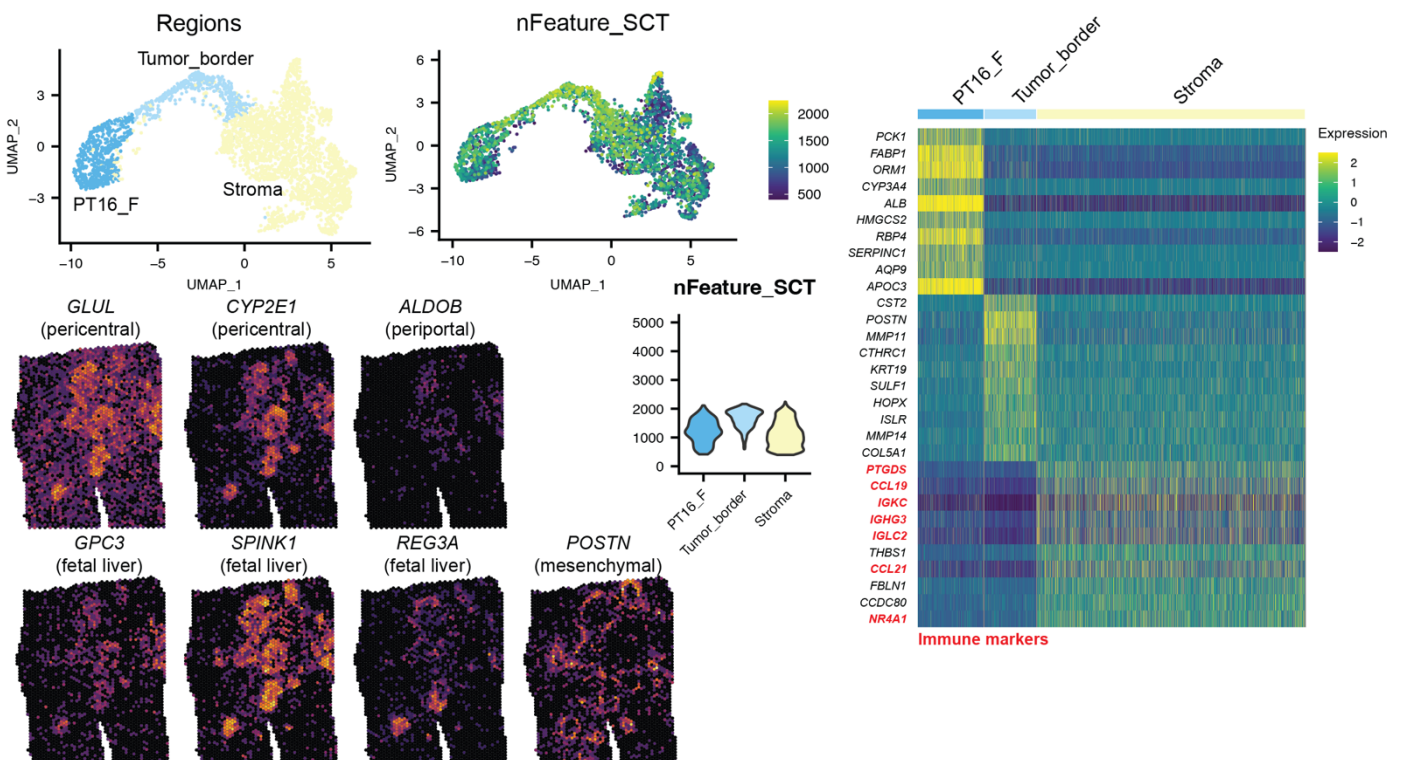

(d) The tumor of PT13 did not receive chemotherapy prior to resection. At least three different tumor clusters were identified: fetal-enriched, embryonal-enriched, and regions likely containing a mix of both populations of tumor cells. Additional tissue heterogeneity could be observed based on markers such as *AFP*.

(e) The tumor of PT16 contained fetal tumor regions. The tumor border showed a distinct expression profile, with high levels of *POSTN* (mesenchymal marker) and *KRT19* (cholangiocyte marker).

f

Spatial analysis PT14 hepatoblastoma

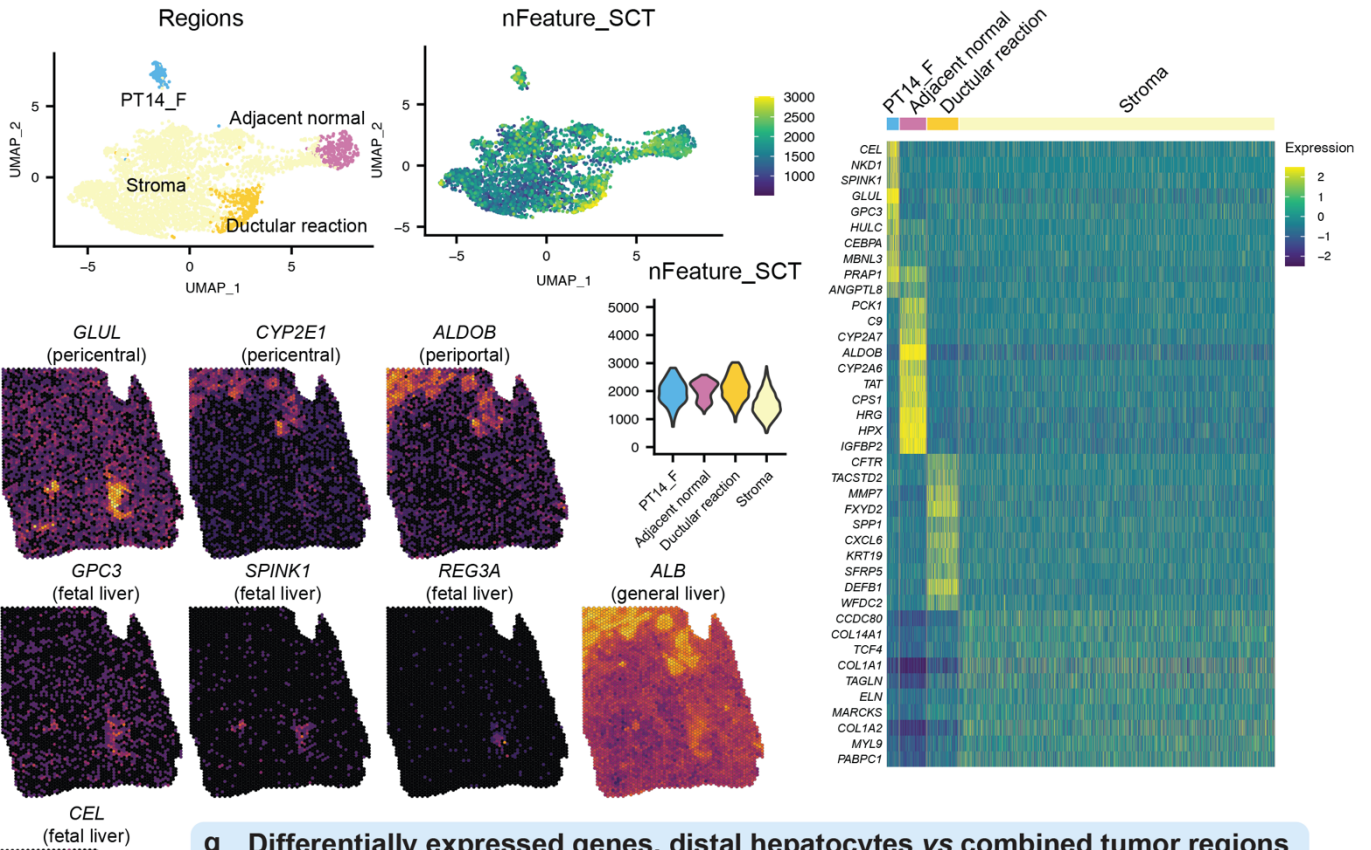

g Differentially expressed genes, distal hepatocytes vs combined tumor regions

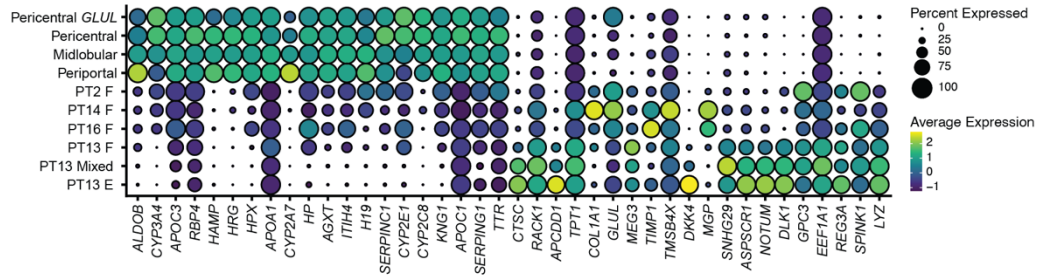

h

Differentially expressed genes, tumor clusters

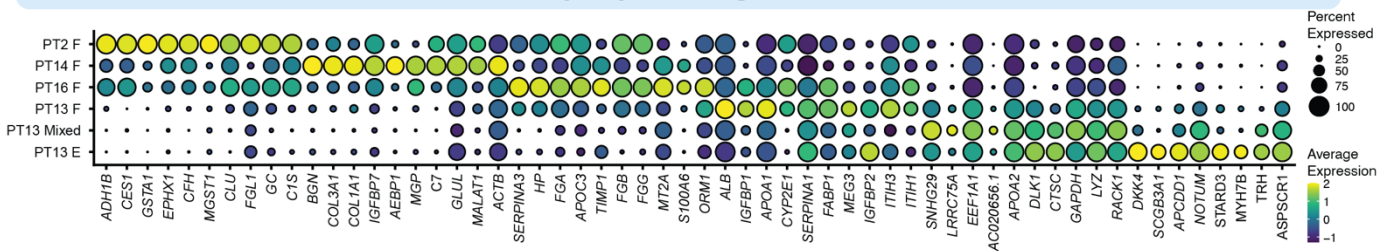

(f) The tumor of PT14 contained fetal tumor, normal liver, ductular reaction and stroma.

(g) Dot plot of the top 20 differentially expressed genes between distal hepatocytes (hepatocyte clusters from Normal PT2) and the combined tumor regions. There is an increased expression of fetal liver genes and a decreased expression of periportal markers in the tumor regions. Inter-tumor heterogeneity can also be observed.

(h) Dot plot of the top 10 differentially expressed genes between the tumor clusters, illustrating tumor-specific expression profiles, and additional heterogeneity within the PT13 tumor.

a

Tissue H&E stainings

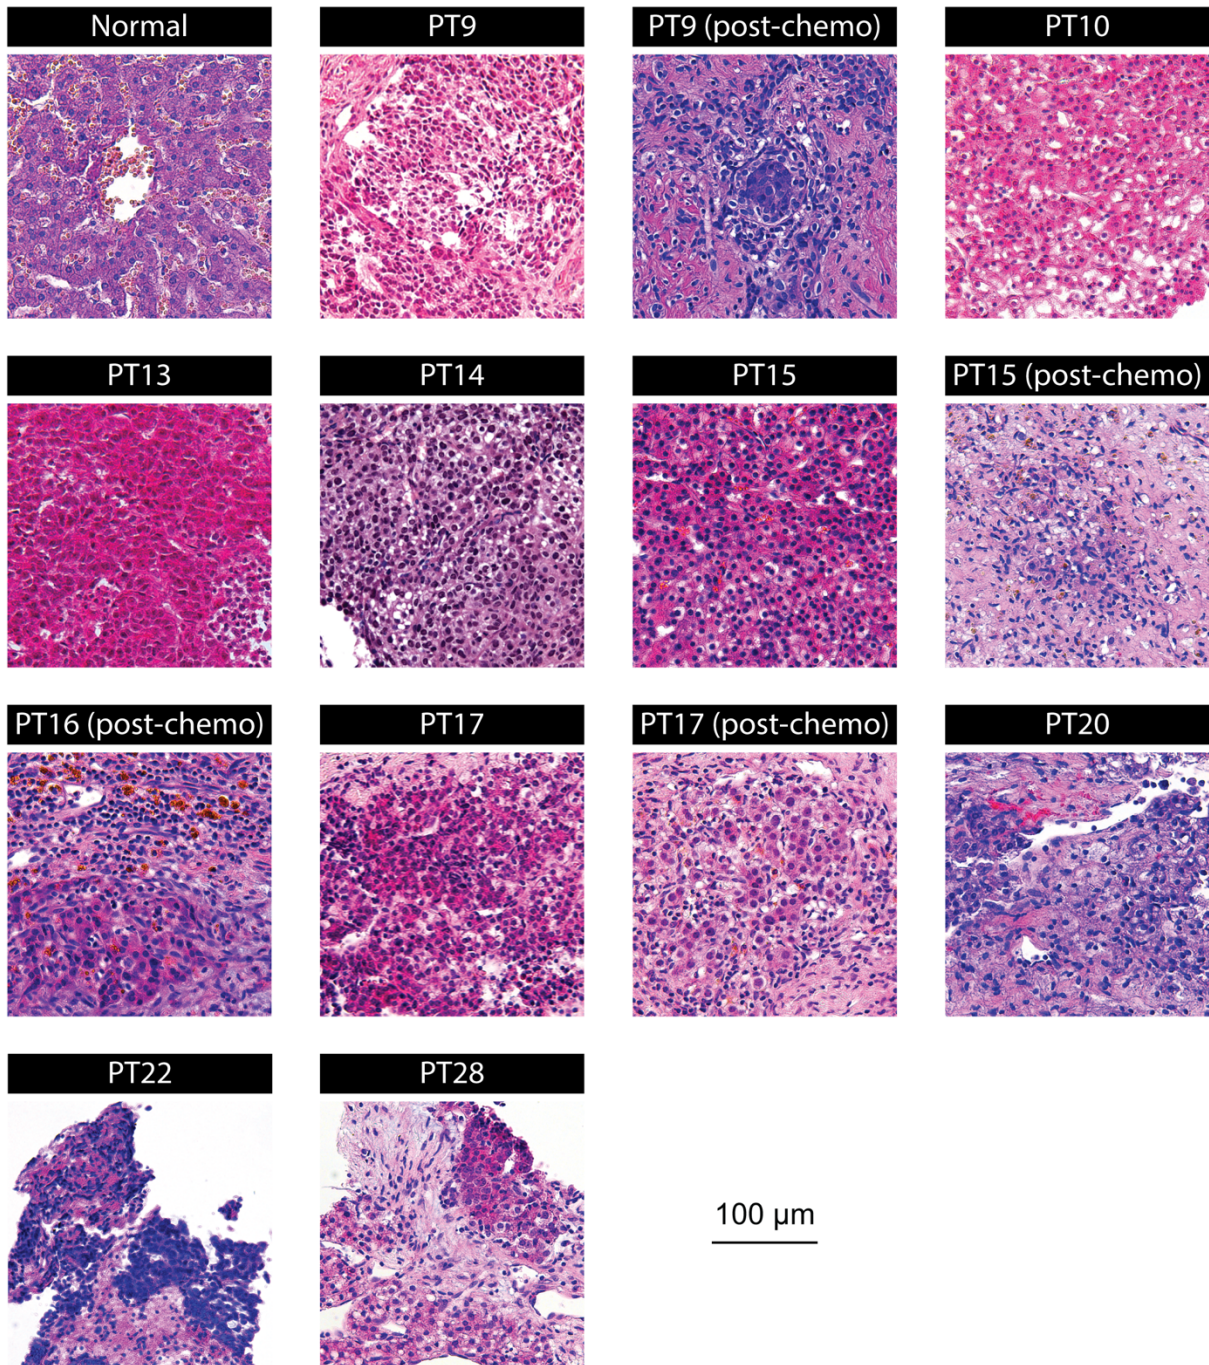

**Supplementary Figure 3. Histological and immunofluorescent analysis of hepatoblastoma tissues.**

(a) H&E stainings of tumor tissues.



**b****Tissue IF staining of LEF1, HNF4A and  $\beta$ -catenin**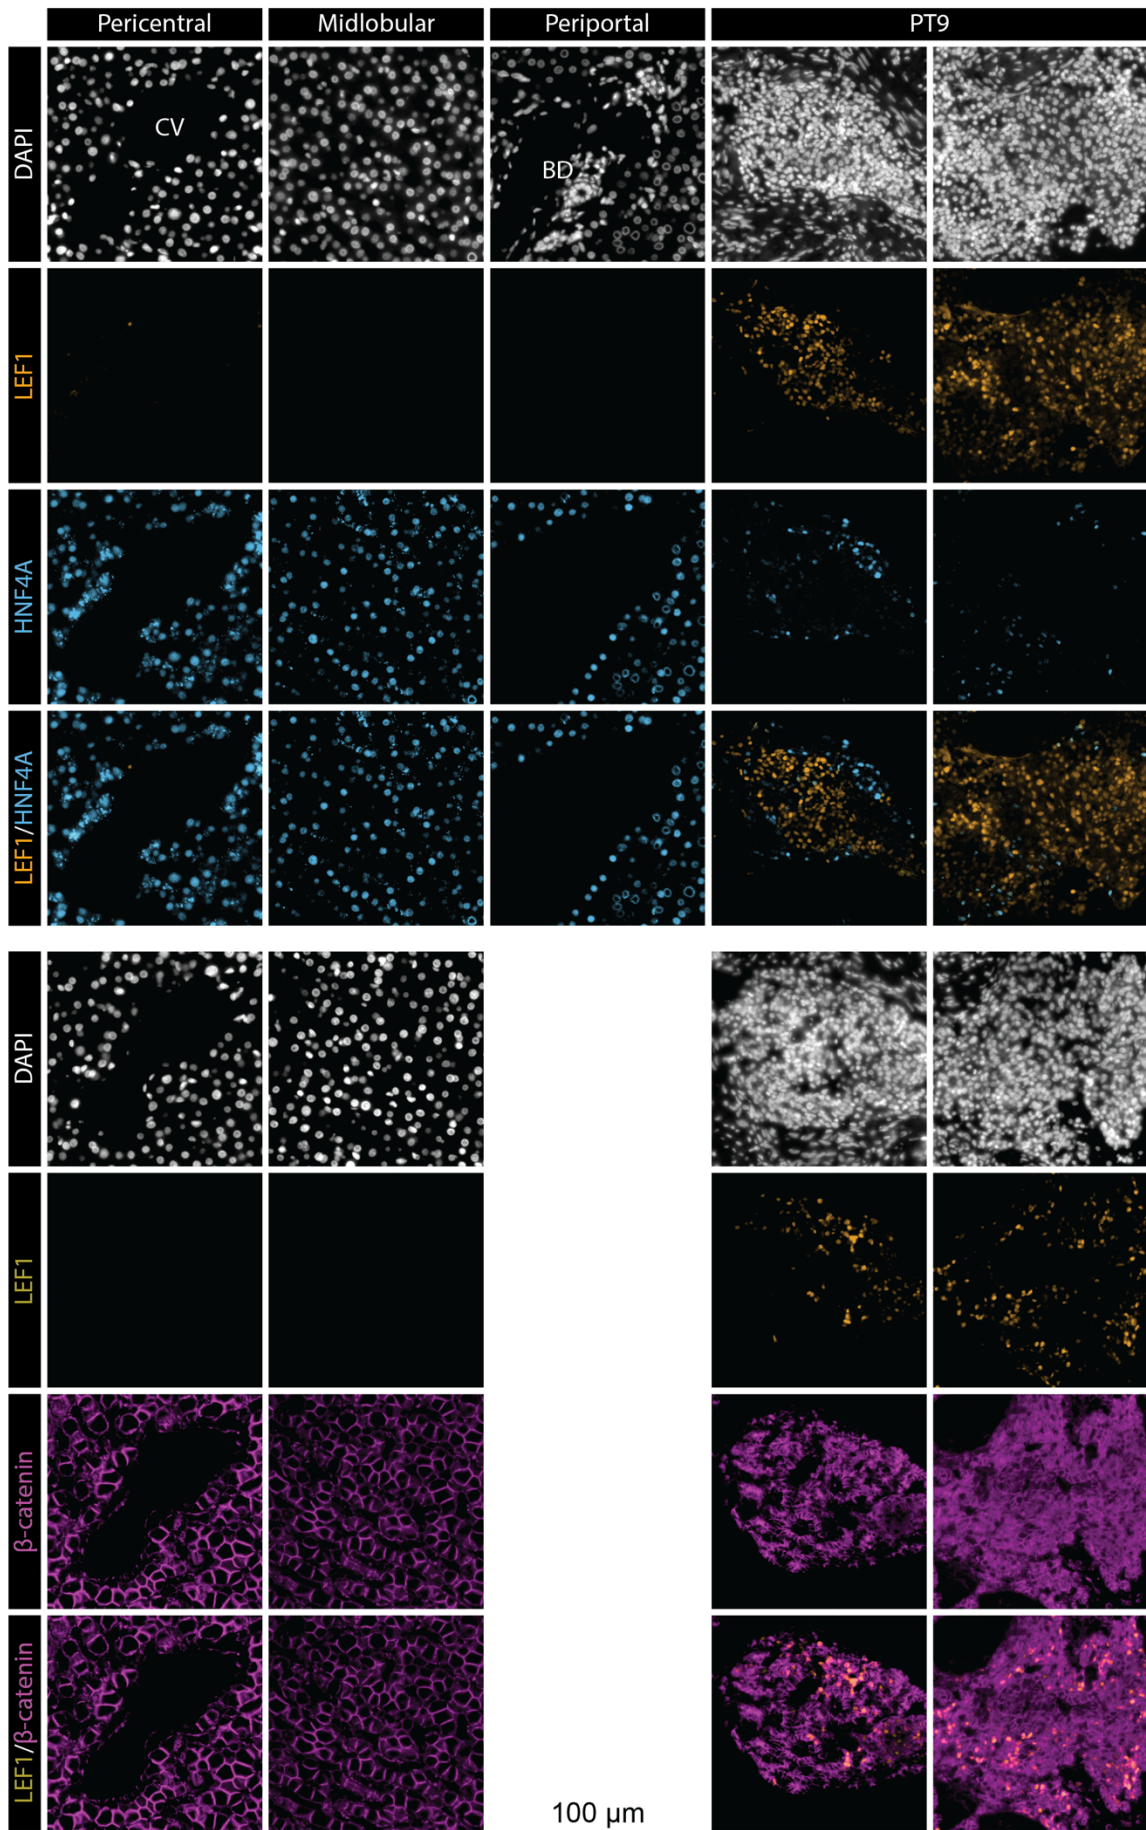

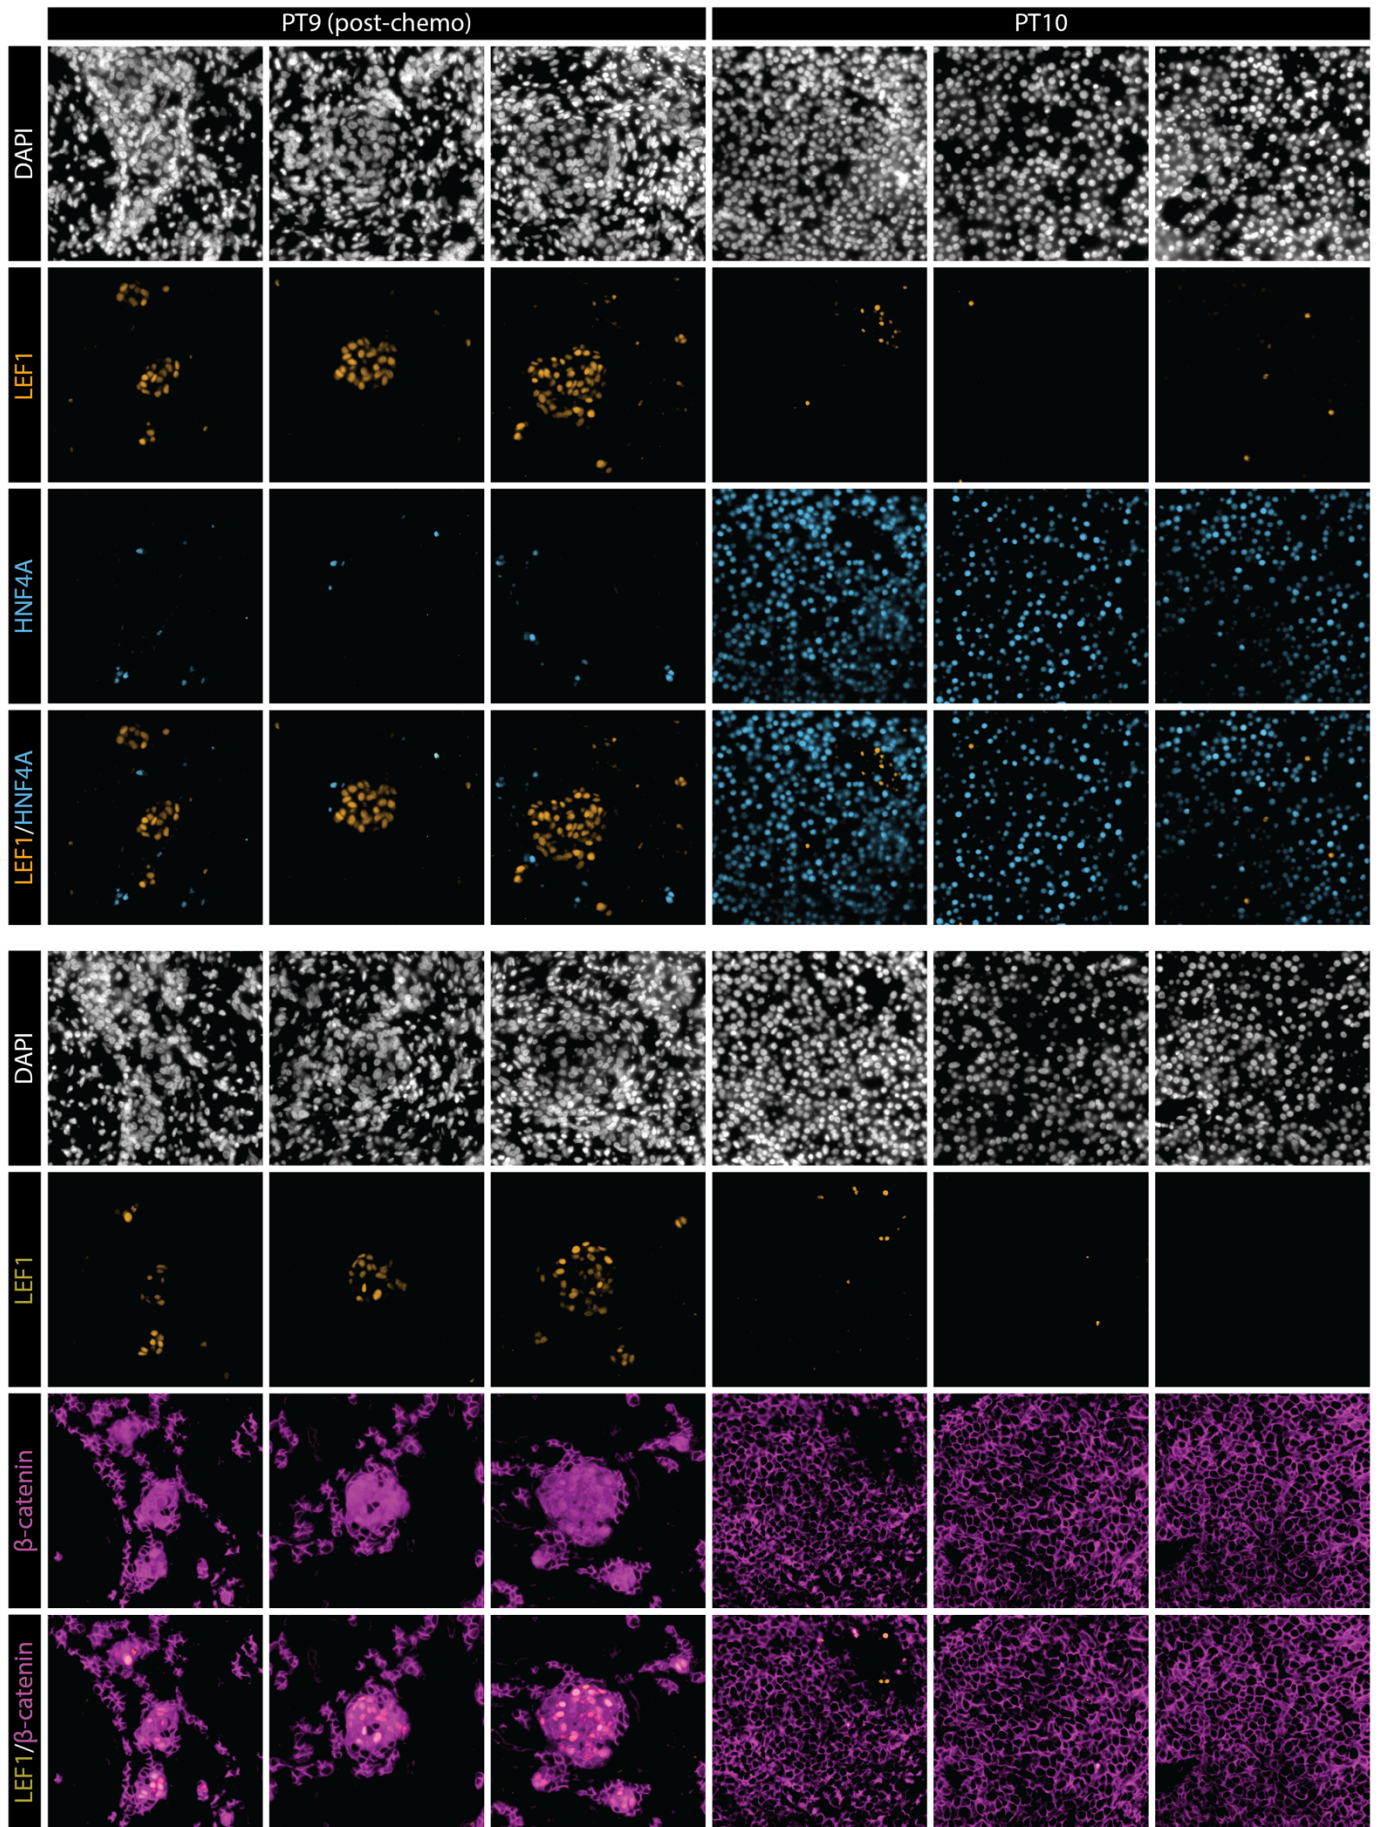

100  $\mu$ m

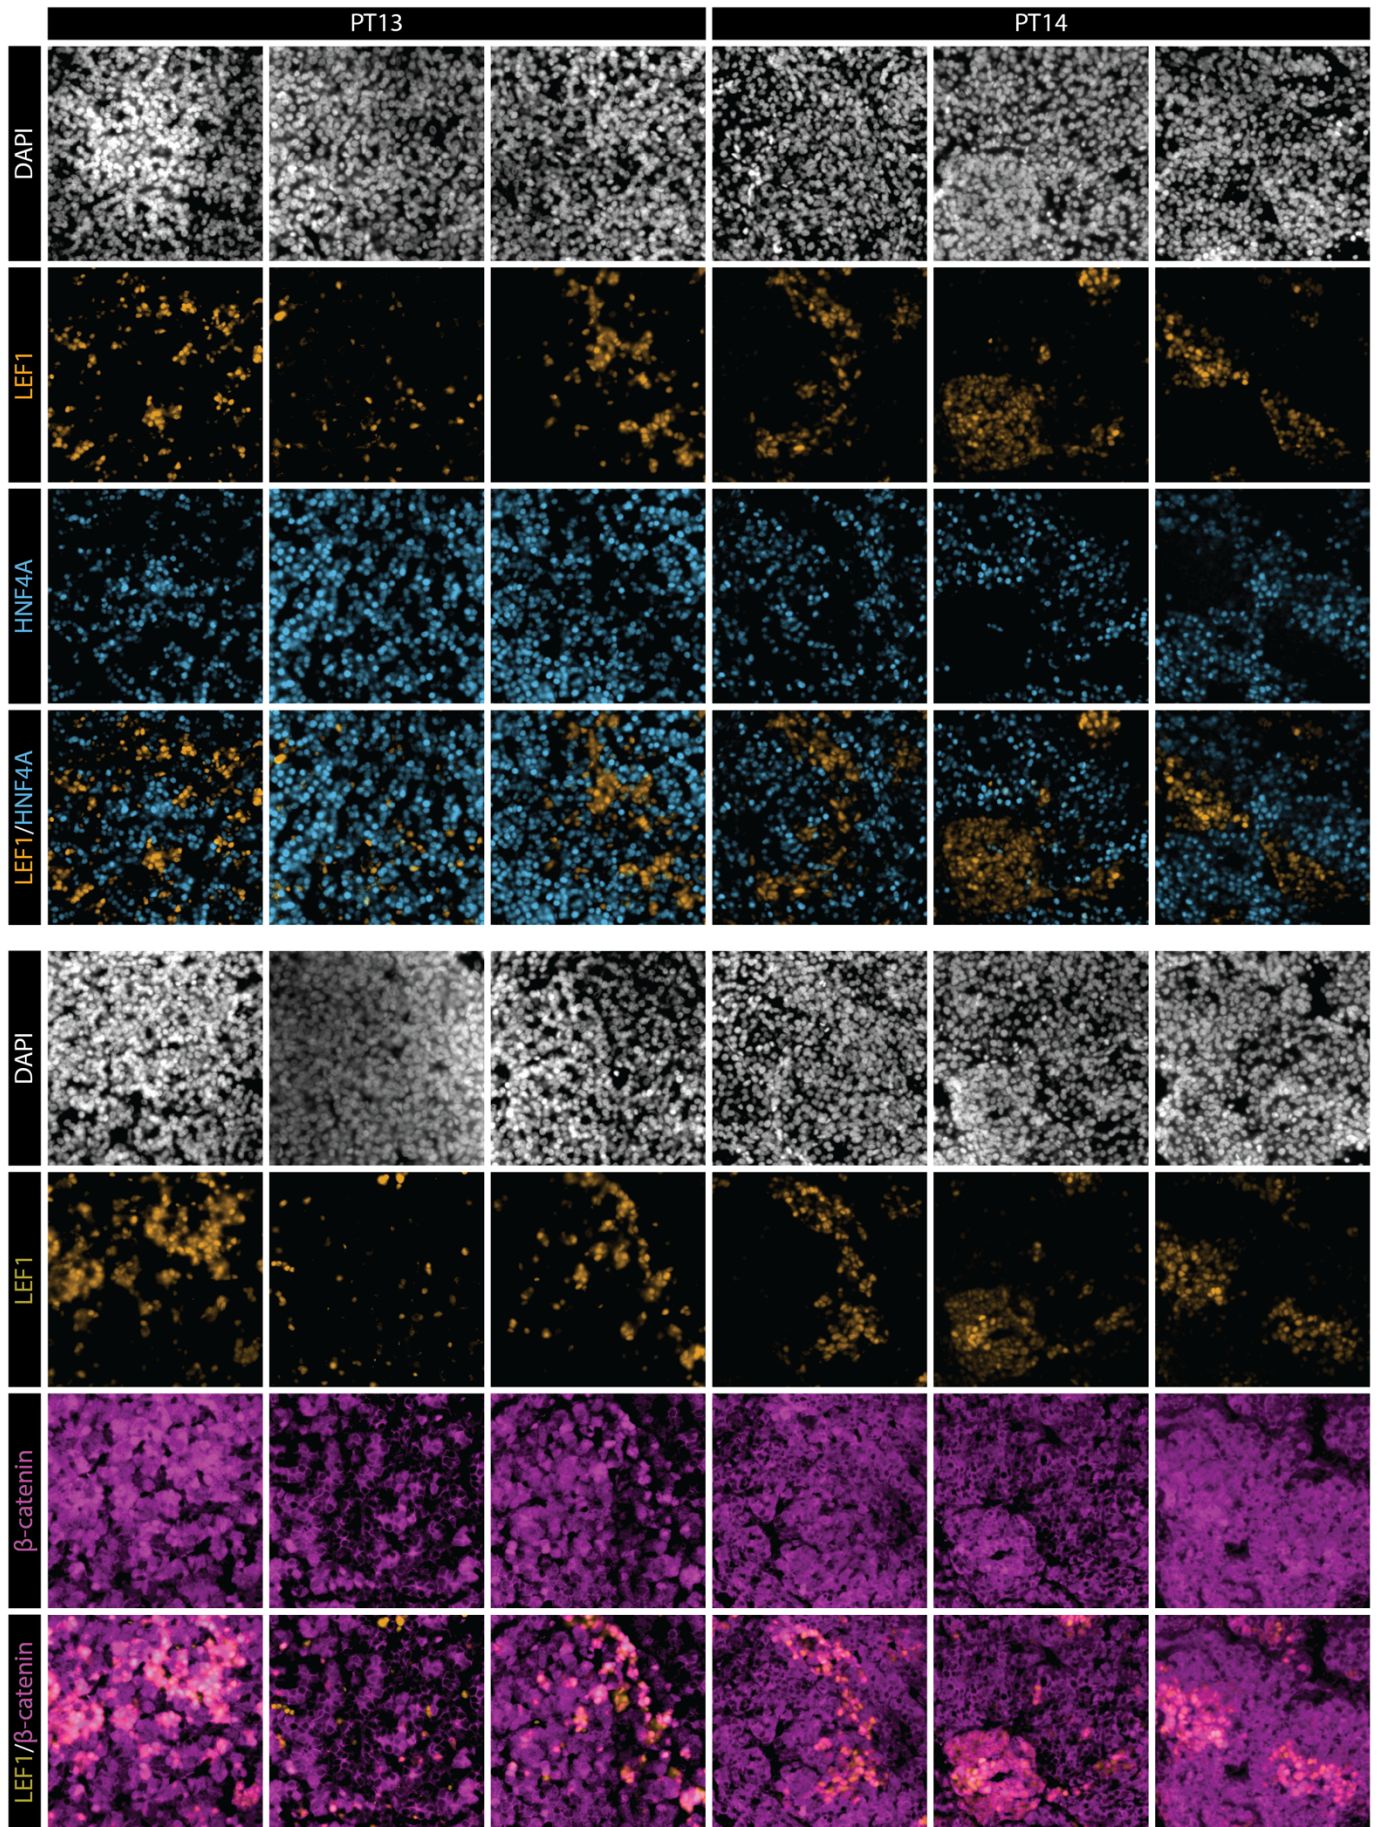

100  $\mu$ m

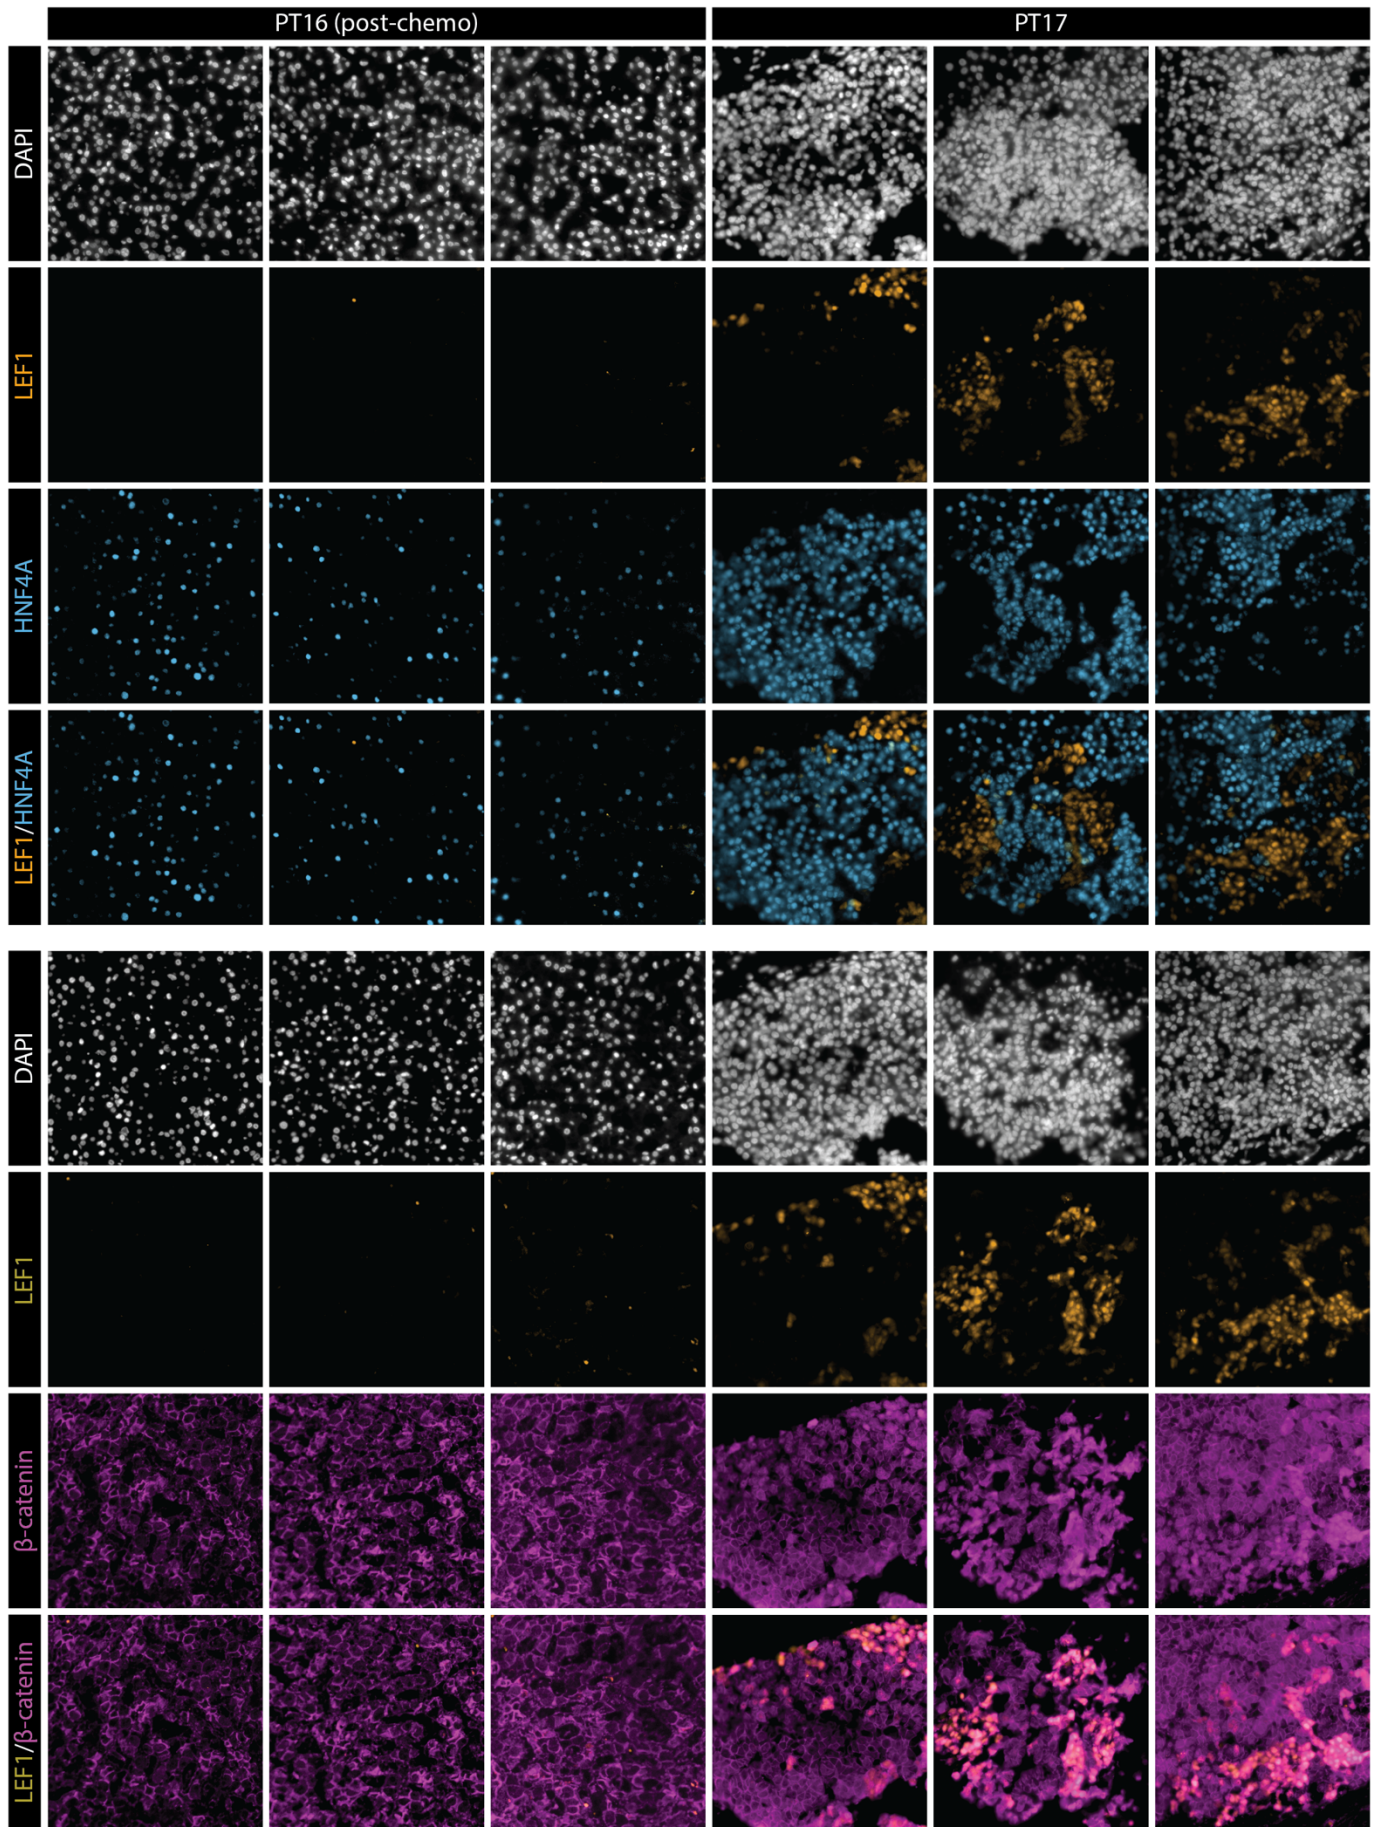

100  $\mu$ m

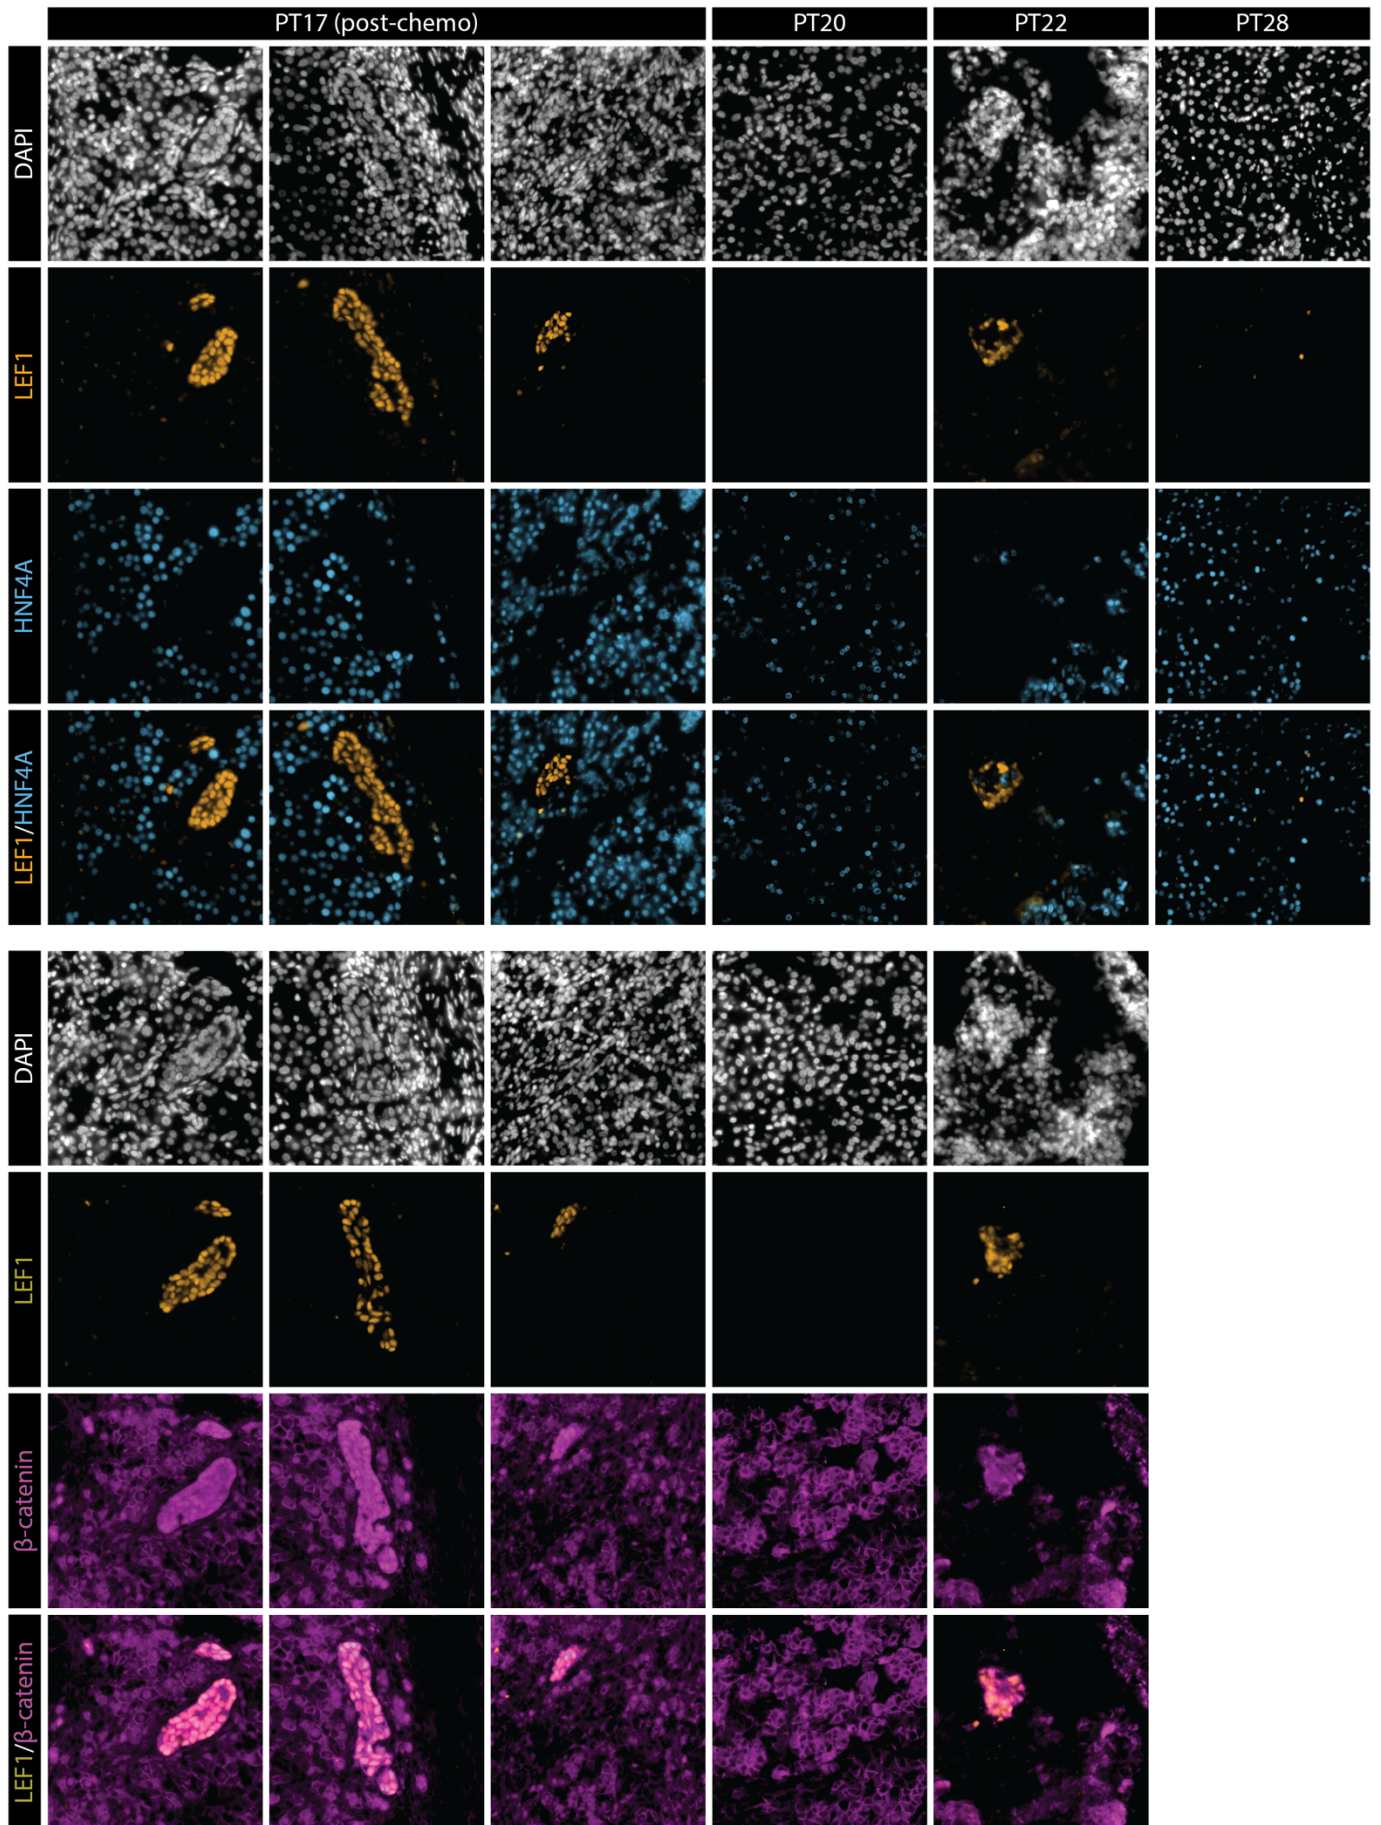

100  $\mu$ m

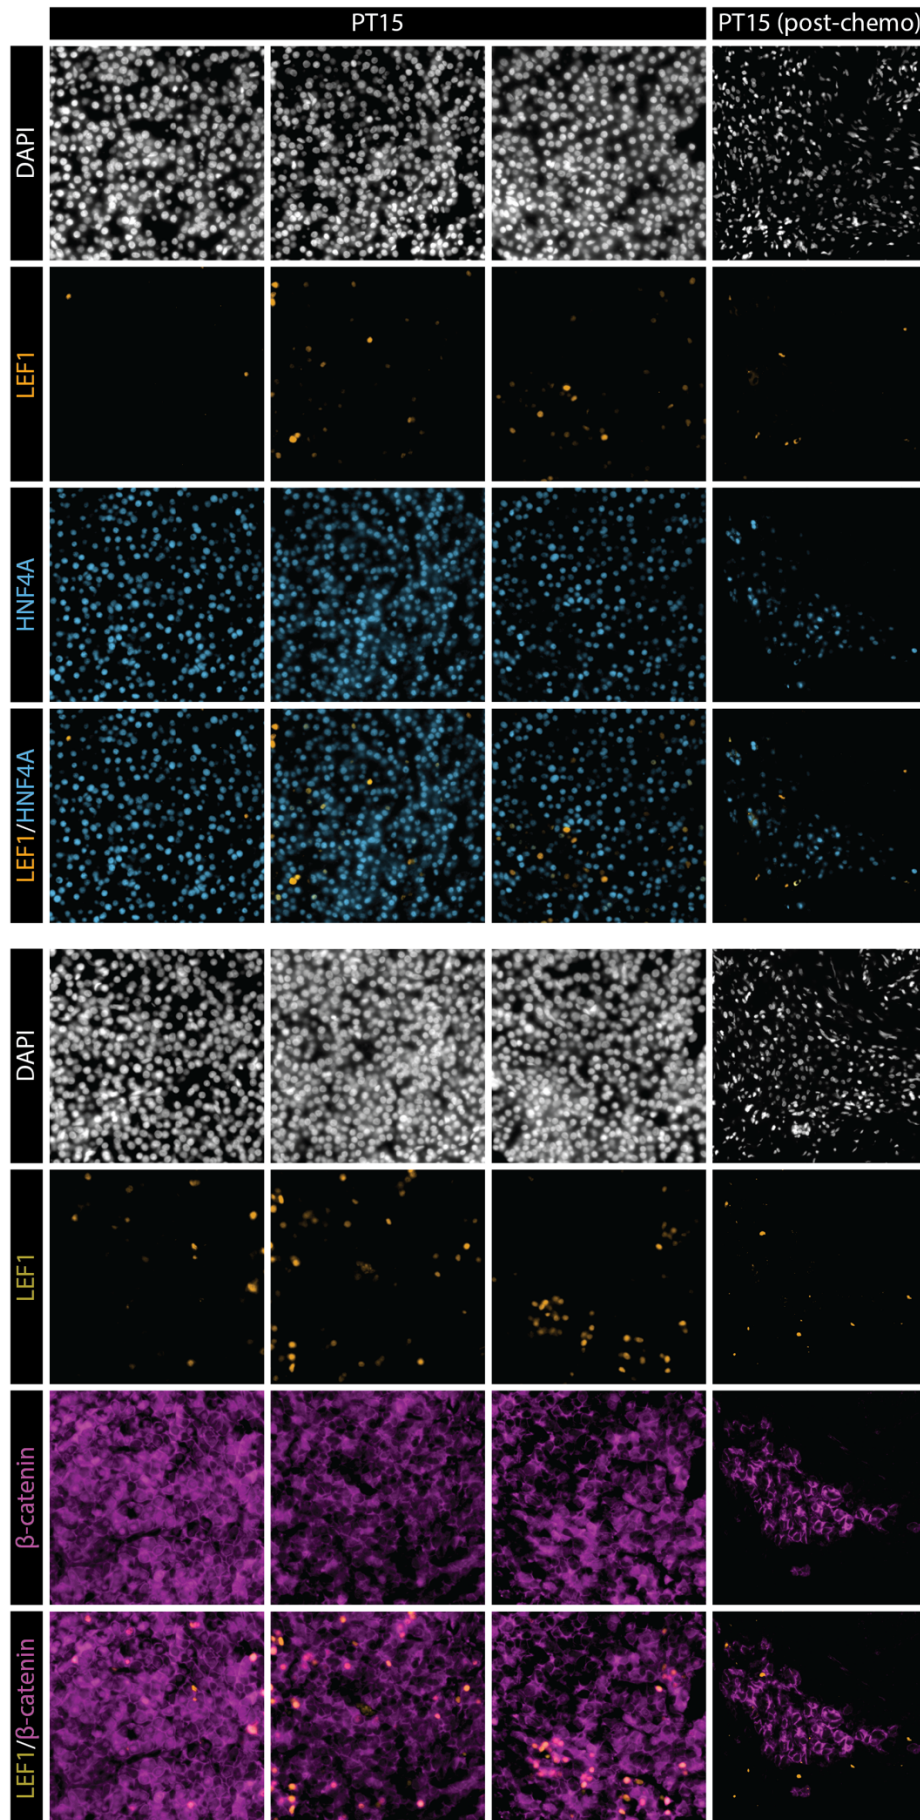

100  $\mu$ m

(b) Co-stainings of HNF4A/LEF1 and  $\beta$ -catenin/LEF1 in normal liver and tumors with fetal and embryonal regions. Co-stainings were performed on consecutive sections and the fields were selected to represent the same regions between the section.  $\beta$ -catenin demonstrated heterogeneity in its staining pattern compared to LEF1.

c

### HNF4A vs LEF1 staining intensity by sample

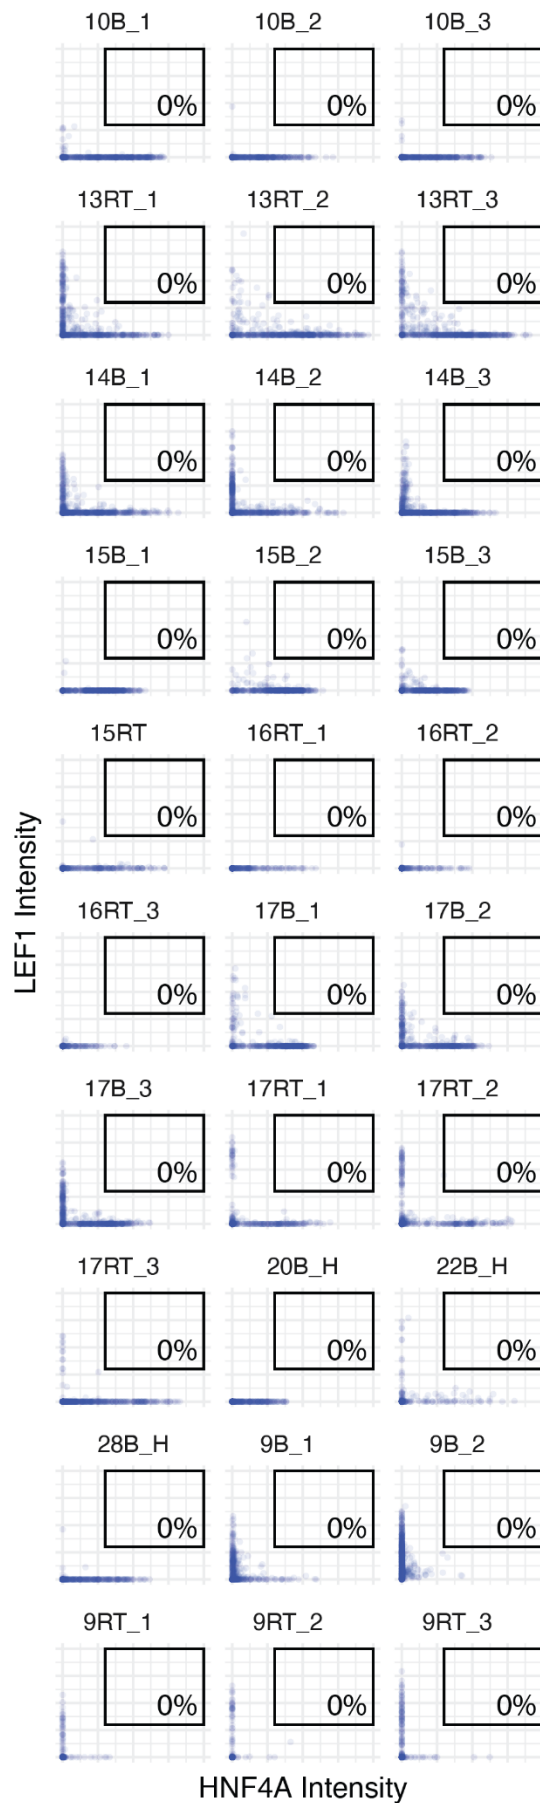

(c) Quantification of LEF1 versus HNF4A signal intensity after nuclear segmentation, per individual image of (b). Source data are provided as a Source Data file.

**a Organoid phase-contrast pictures**

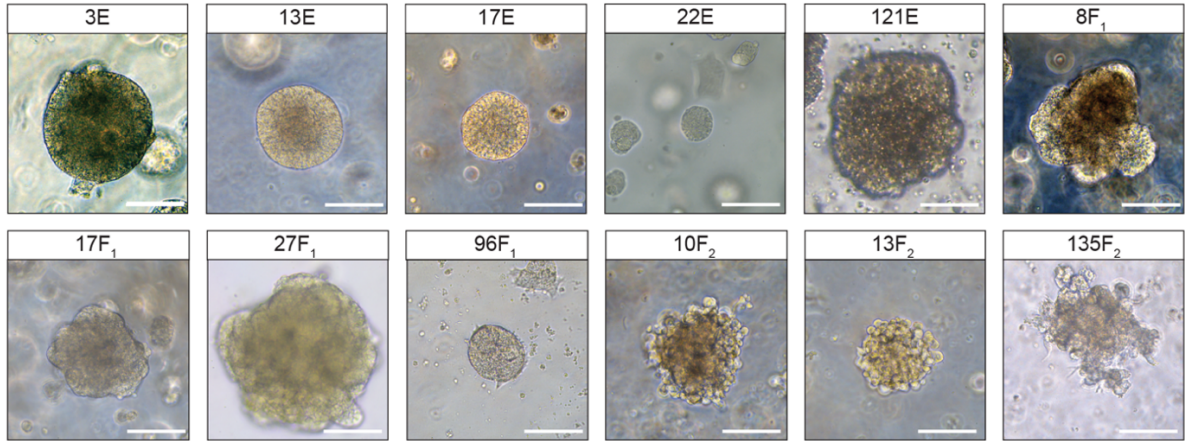

**b Organoid H&E stainings**

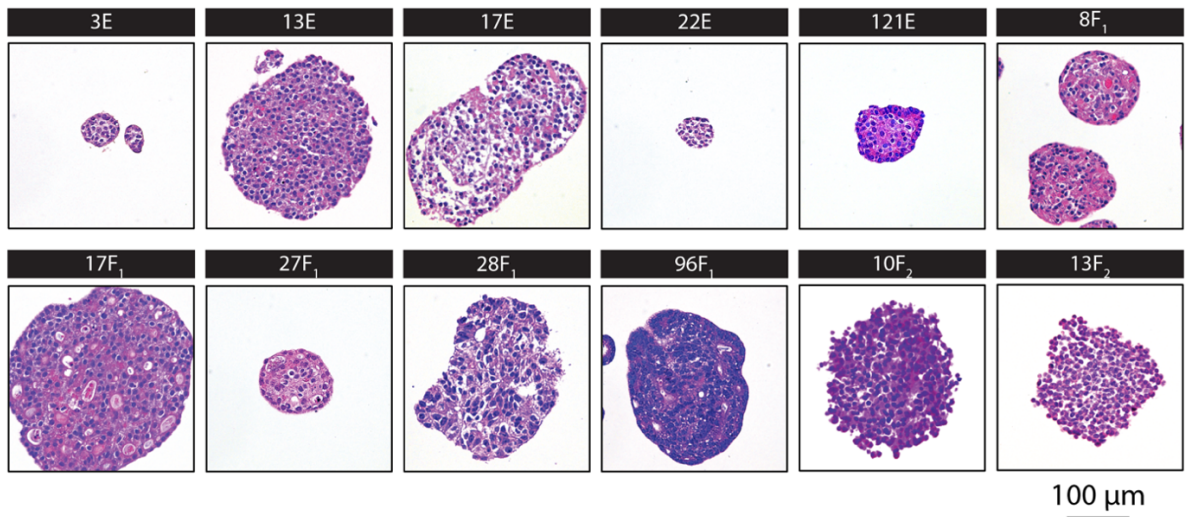

**c Organoid  $\beta$ -catenin western blot**

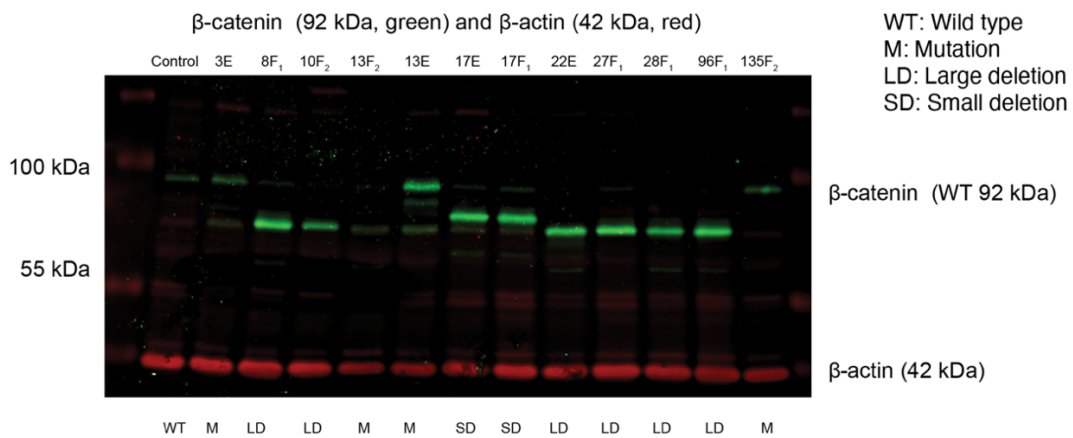

**Supplementary Figure 4. Hepatoblastoma organoid analysis.**

(a) Phase-contrast images of organoids. Morphologically, embryonal tumor organoids are more densely packed and have smooth surfaces while fetal tumor organoids have more irregular shapes. Scale bars, 100  $\mu$ m.

(b) H&E stainings of organoids.

(c) Western blot confirms expression of mutant  $\beta$ -catenin proteins in organoid samples with exon 3 deletions. As positive controls, organoid samples with missense mutations and an HCC organoid sample with wild type *CTNNB1* were used. Lysates were measured in at least two independent experiments.



d

## Organoid inferCNV analysis

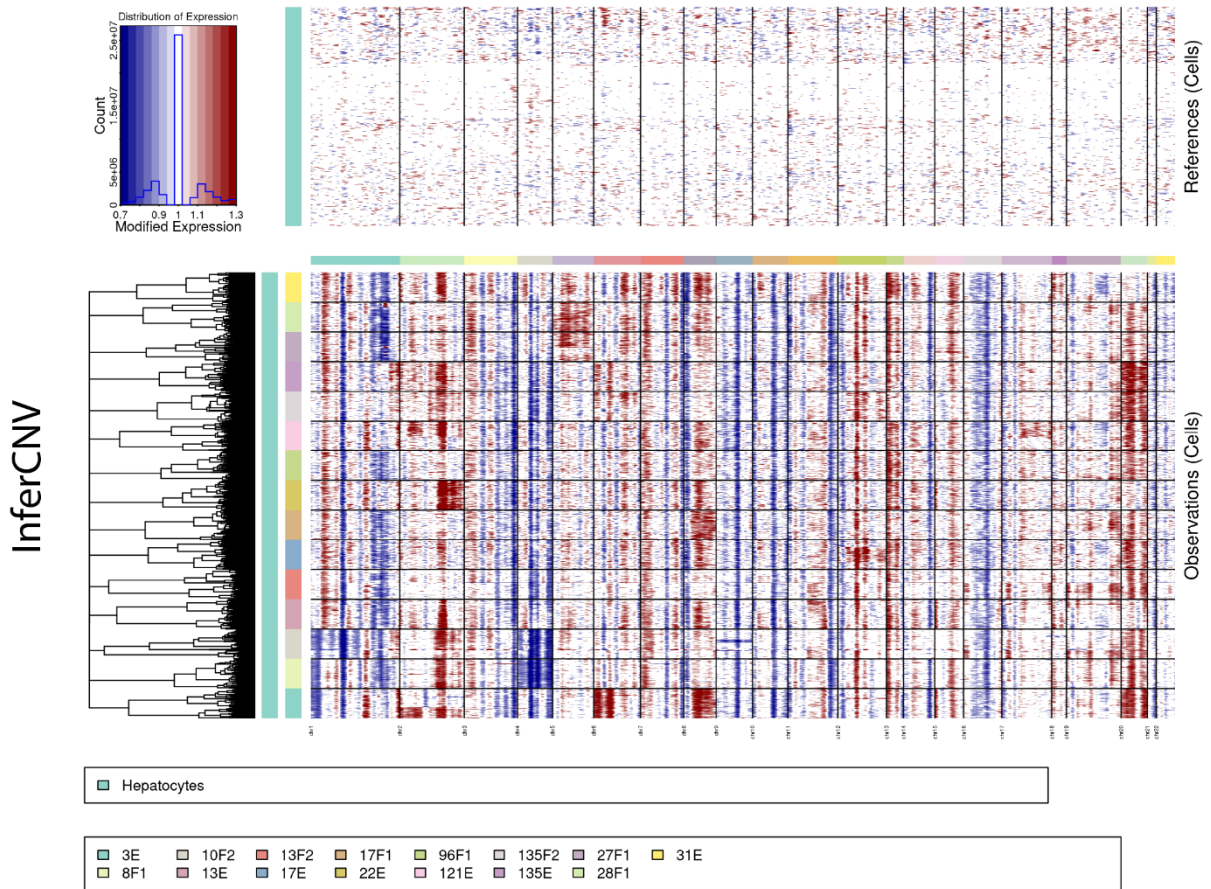

e

## Organoid UMAP

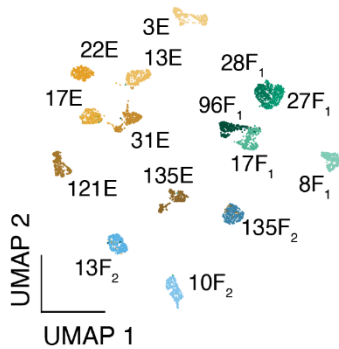f UMAP with low and high passage 13F<sub>2</sub>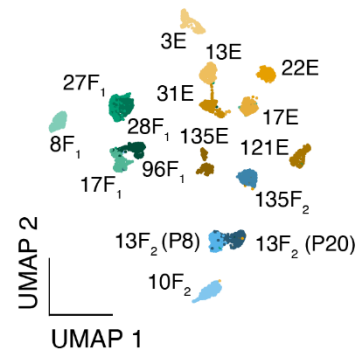

(d) InferCNV based on organoid scRNA-seq data. The hepatocyte cluster from the Song *et al.* dataset was used as reference cells.

(e) scRNA-seq UMAP of all organoids models.

(f) scRNA-seq UMAP of all organoids with low and high passage number 13F<sub>2</sub>.

g

## Differentially expressed genes, organoid scRNA-seq

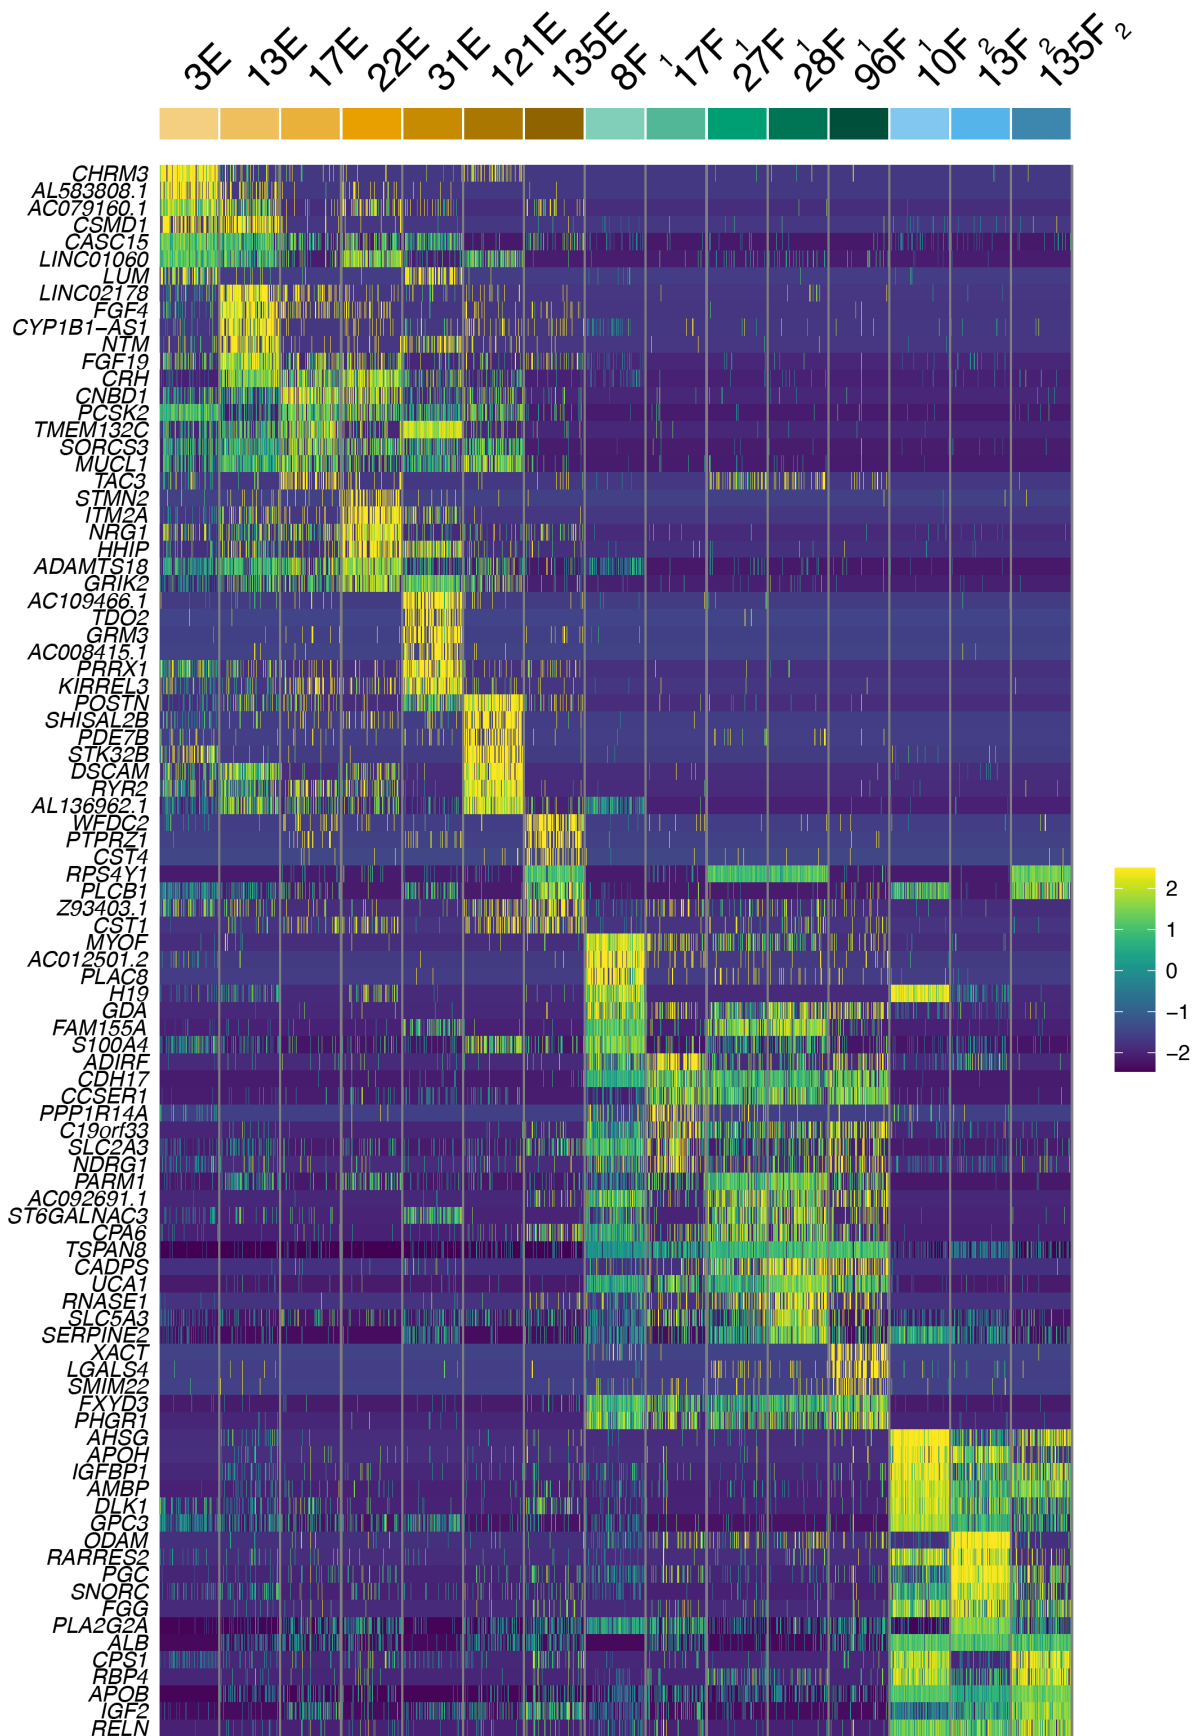

(g) Heatmap showing the top differentially expressed genes per organoid model.

a

## Differentially active regulons, organoid SCENIC

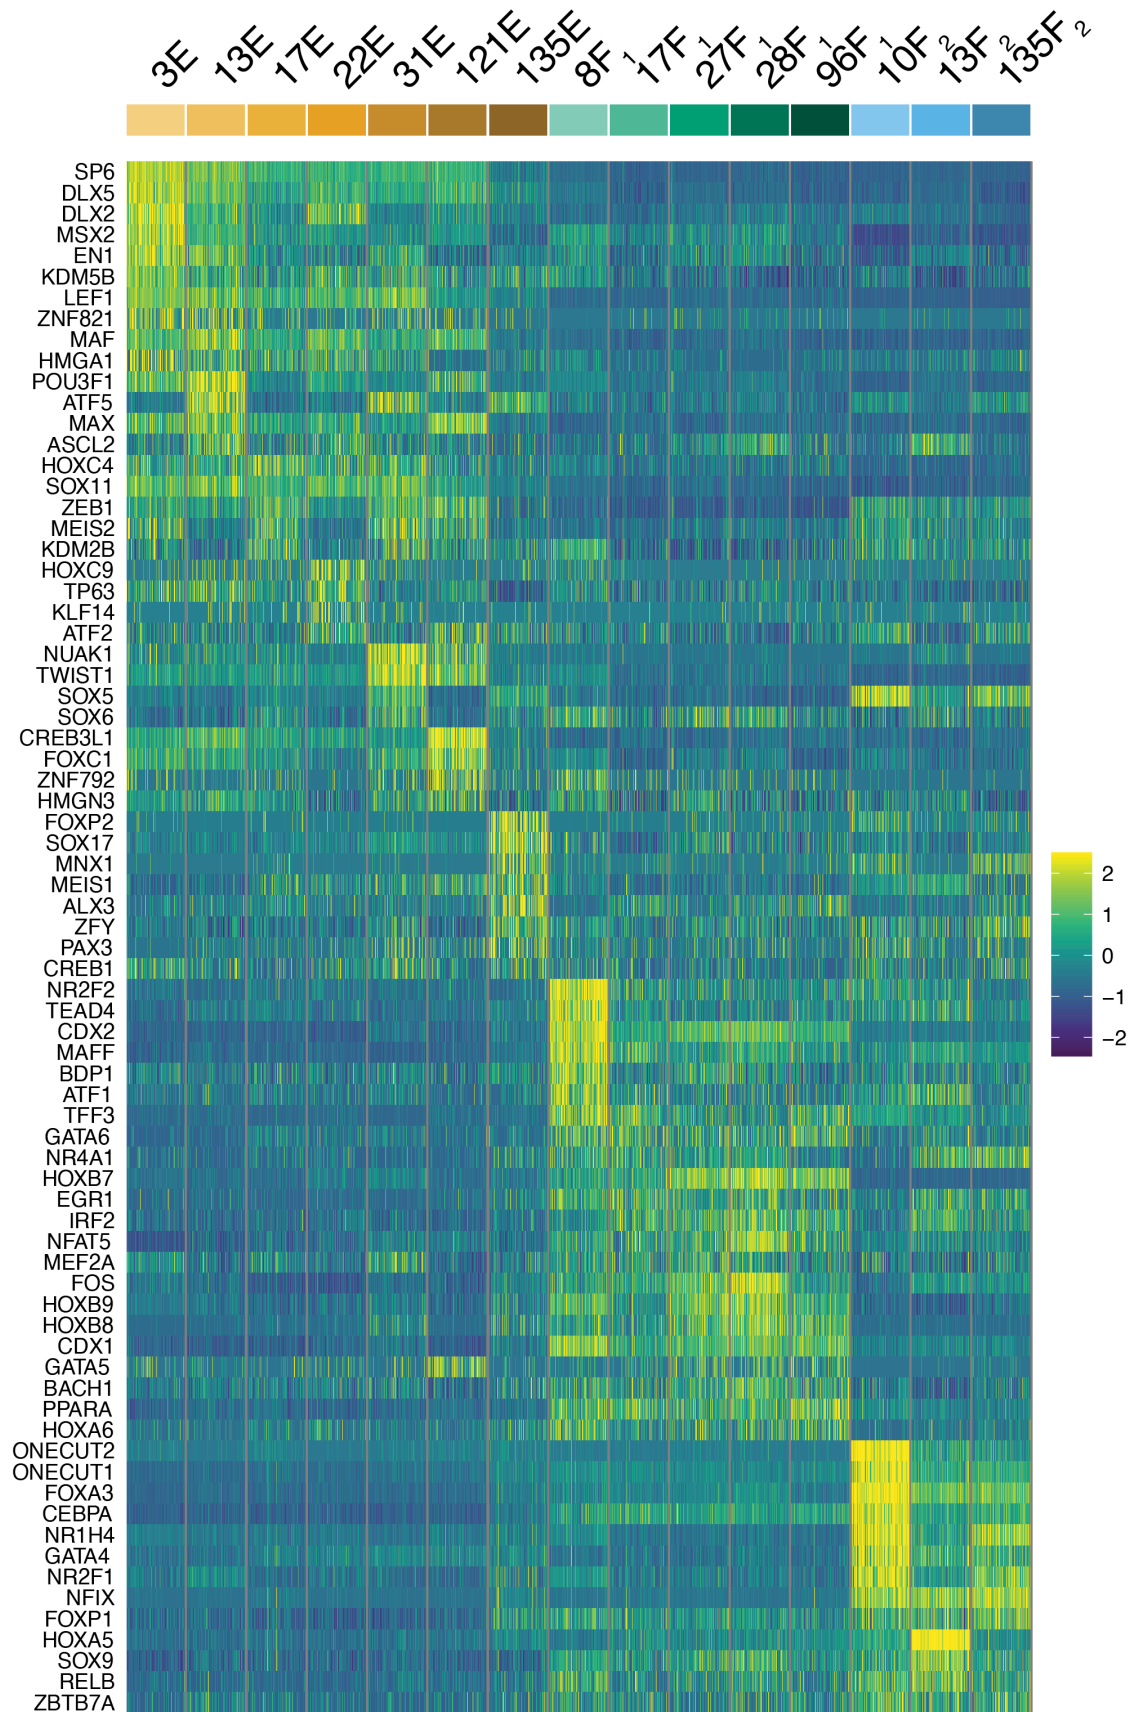

Supplementary Figure 5. Multiome and regulon analysis of hepatoblastoma organoids.

(a) Heatmap showing the top active SCENIC regulons per organoid model.

**b****Differentially expressed genes, organoid snRNA-seq**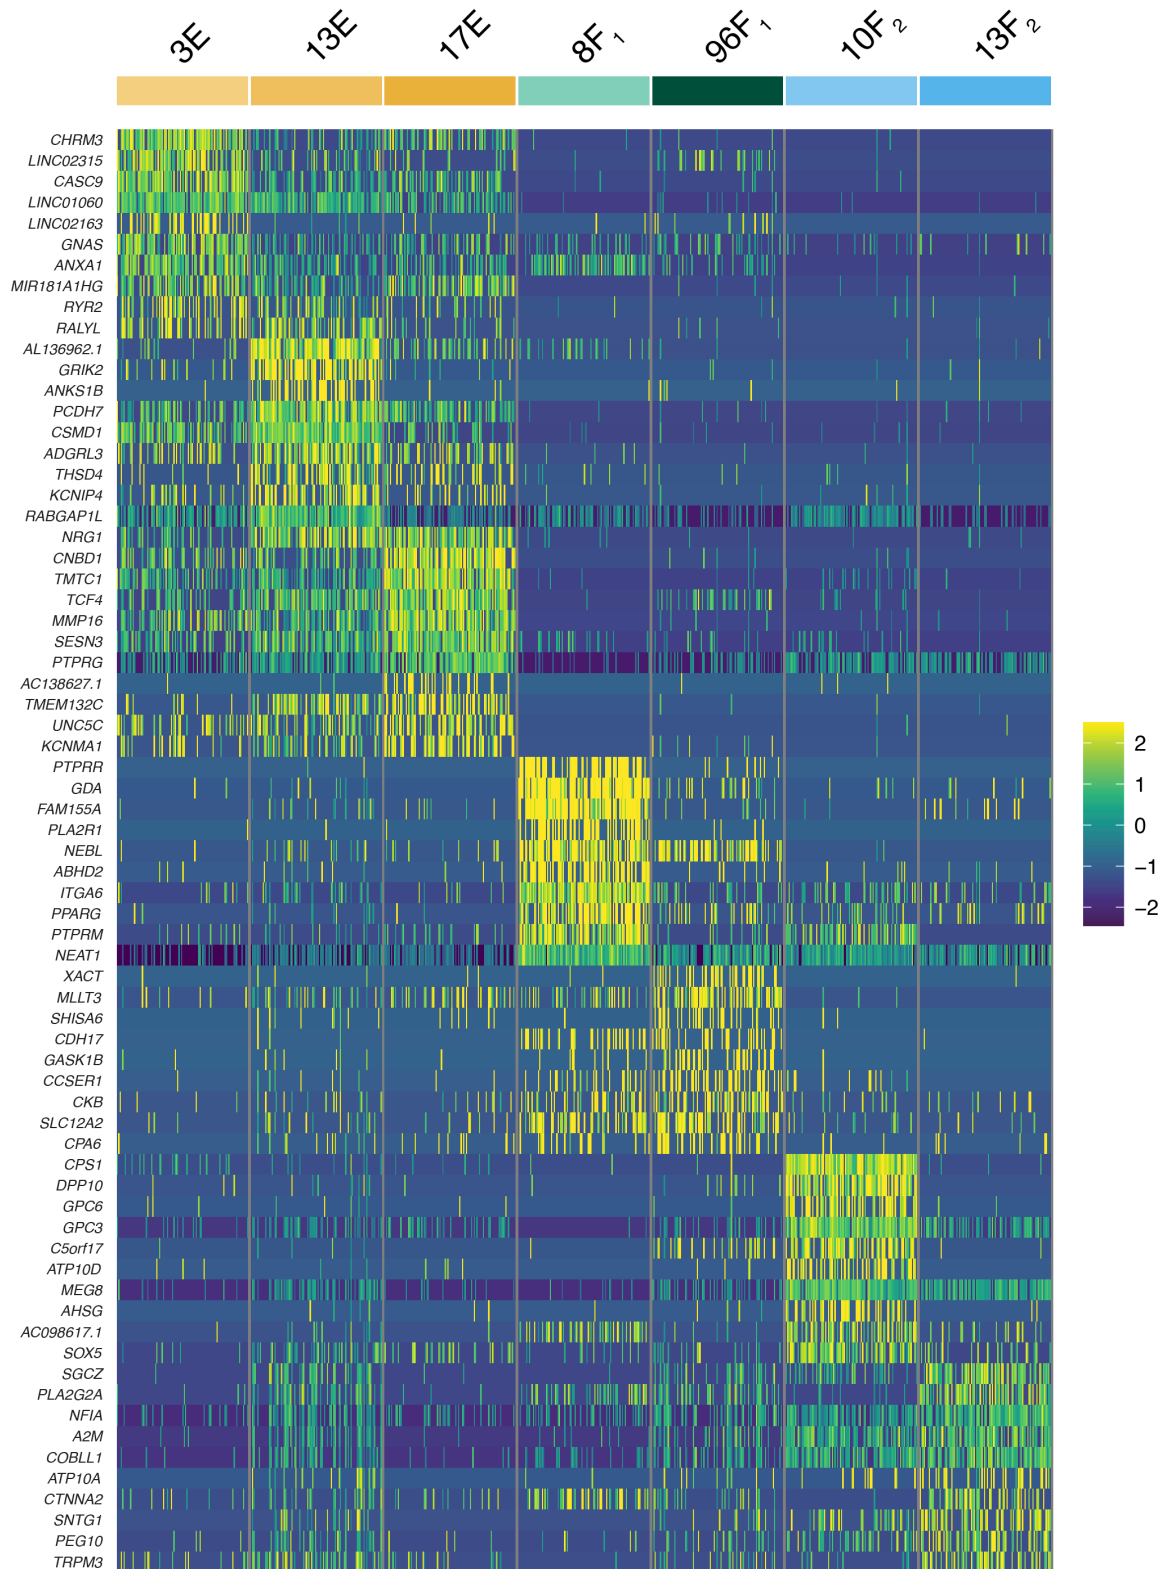

(b) Heatmap showing the top differentially expressed genes per organoid model based on the RNA counts of the single nucleus 10x Multiome dataset.

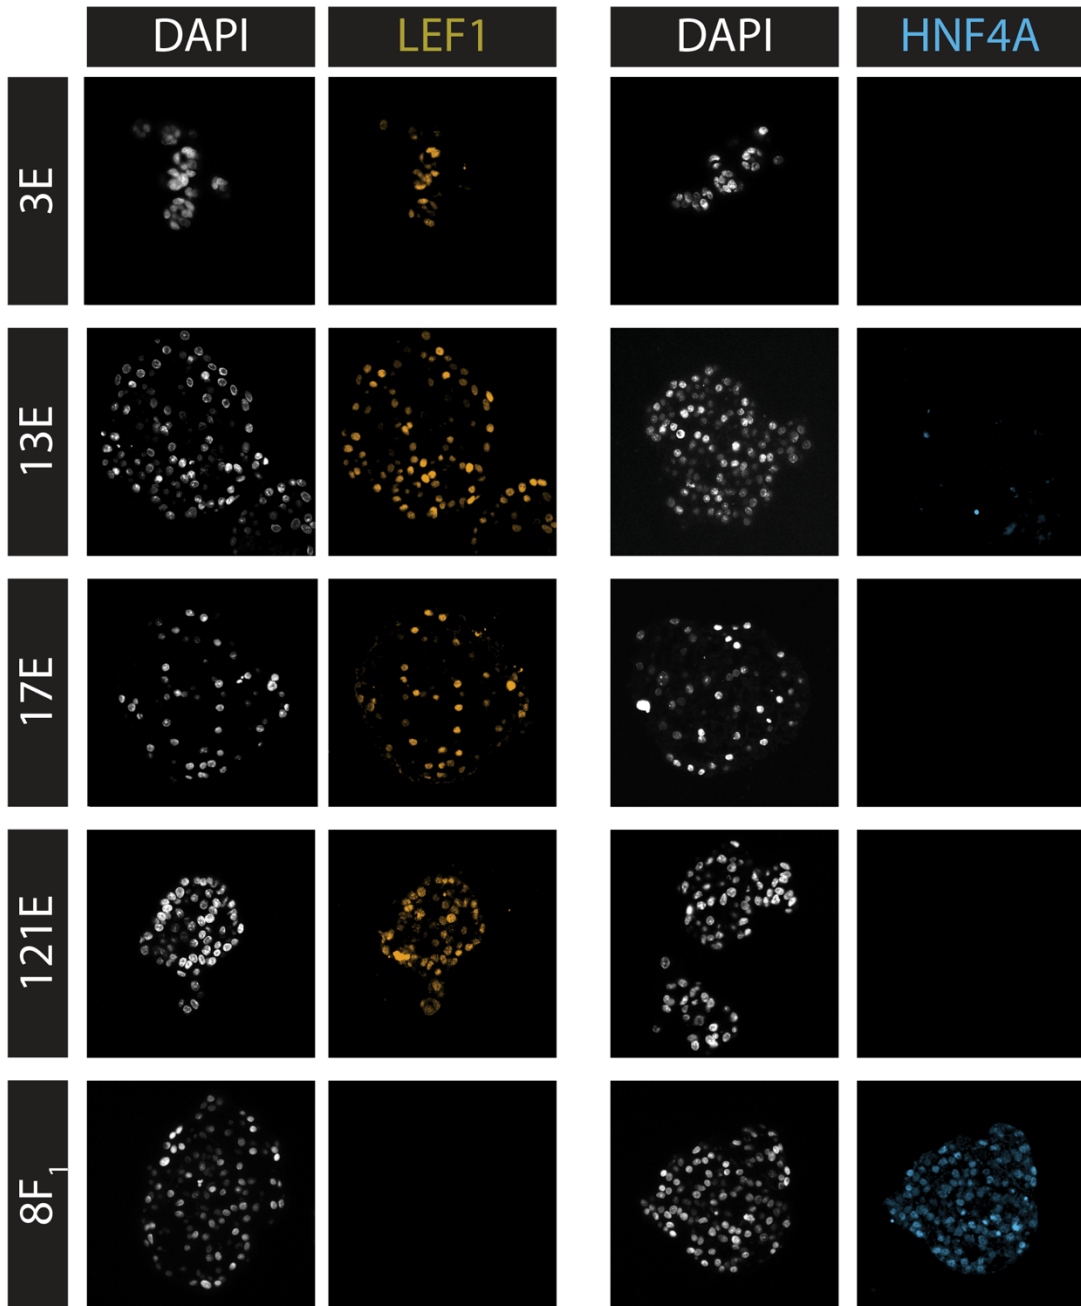100  $\mu$ m

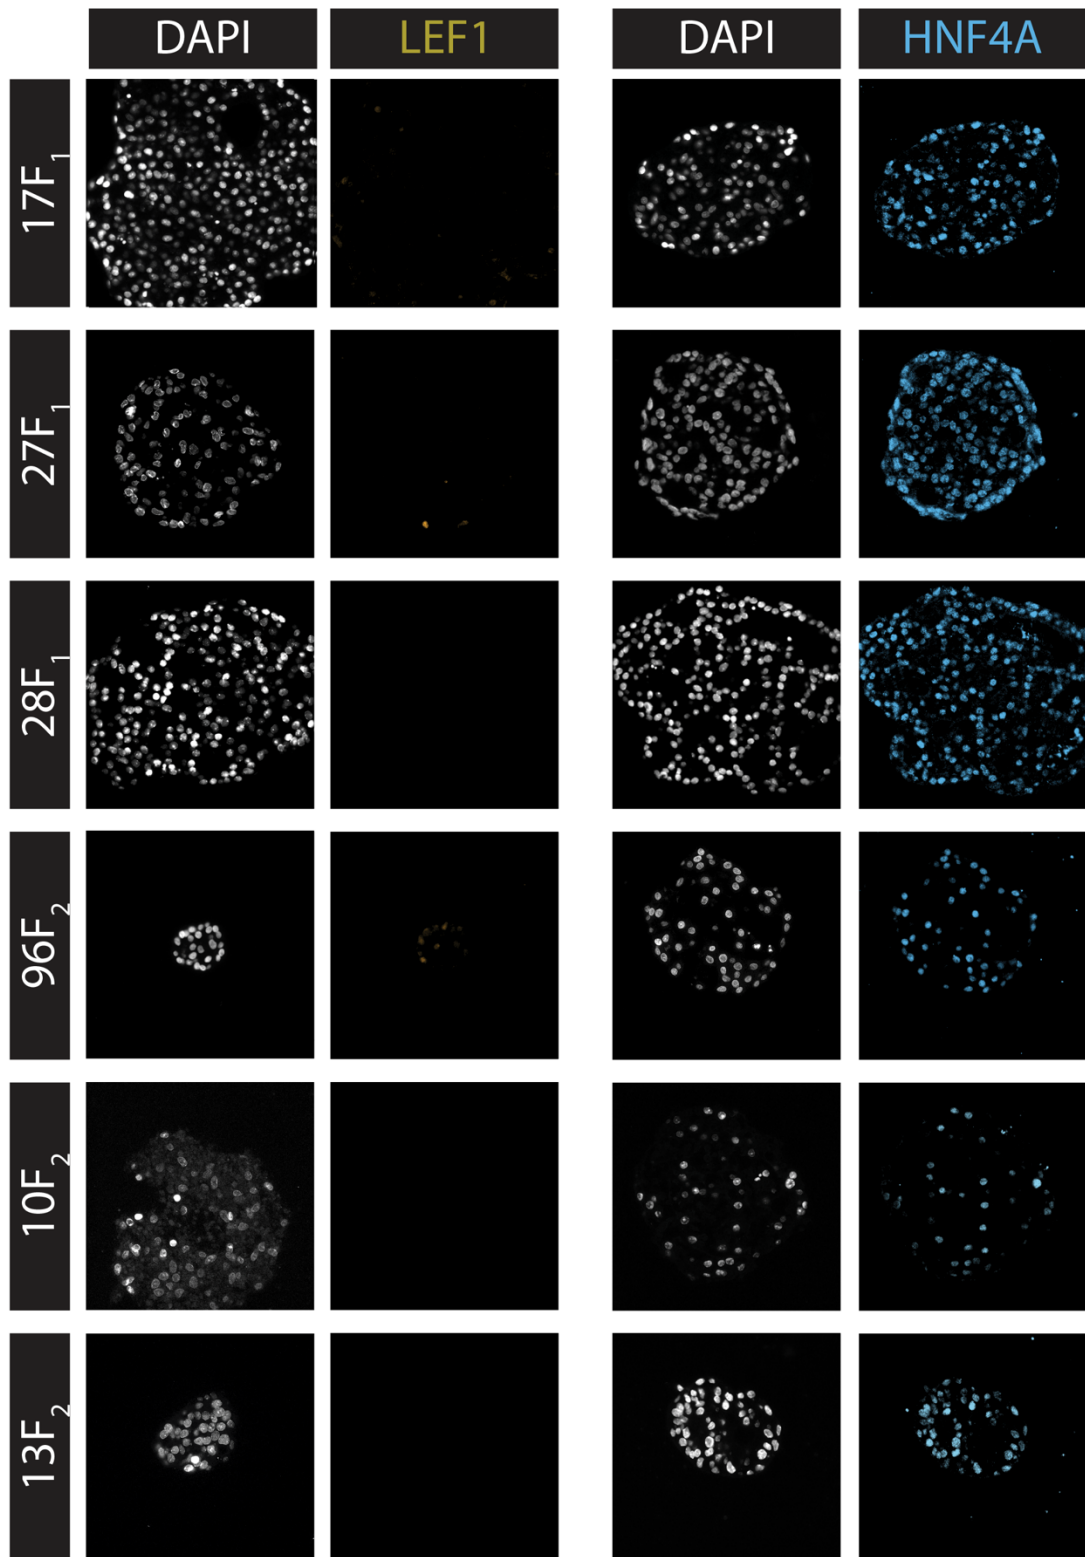

100 μm

(c) IF staining of HNF4A and LEF1 in the organoid cohort, confirming the transcriptomic classification.

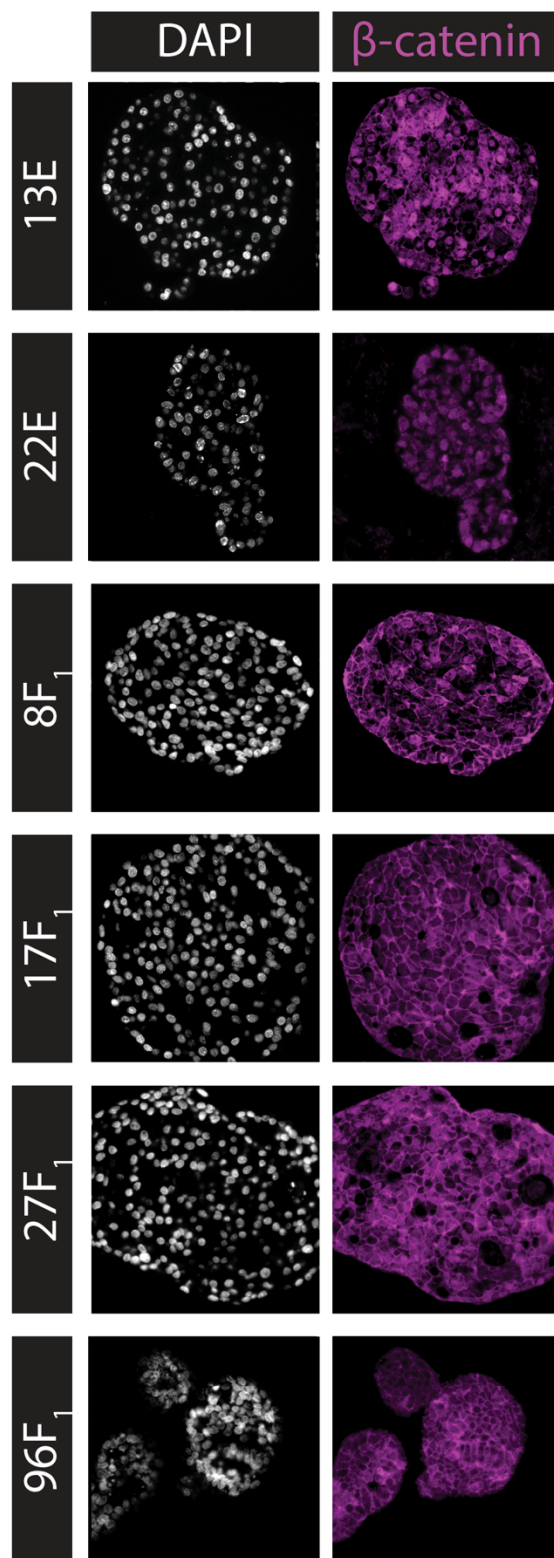100  $\mu$ m(d) IF staining of  $\beta$ -catenin in representative organoids.

a

## Dose-response AUC heatmap

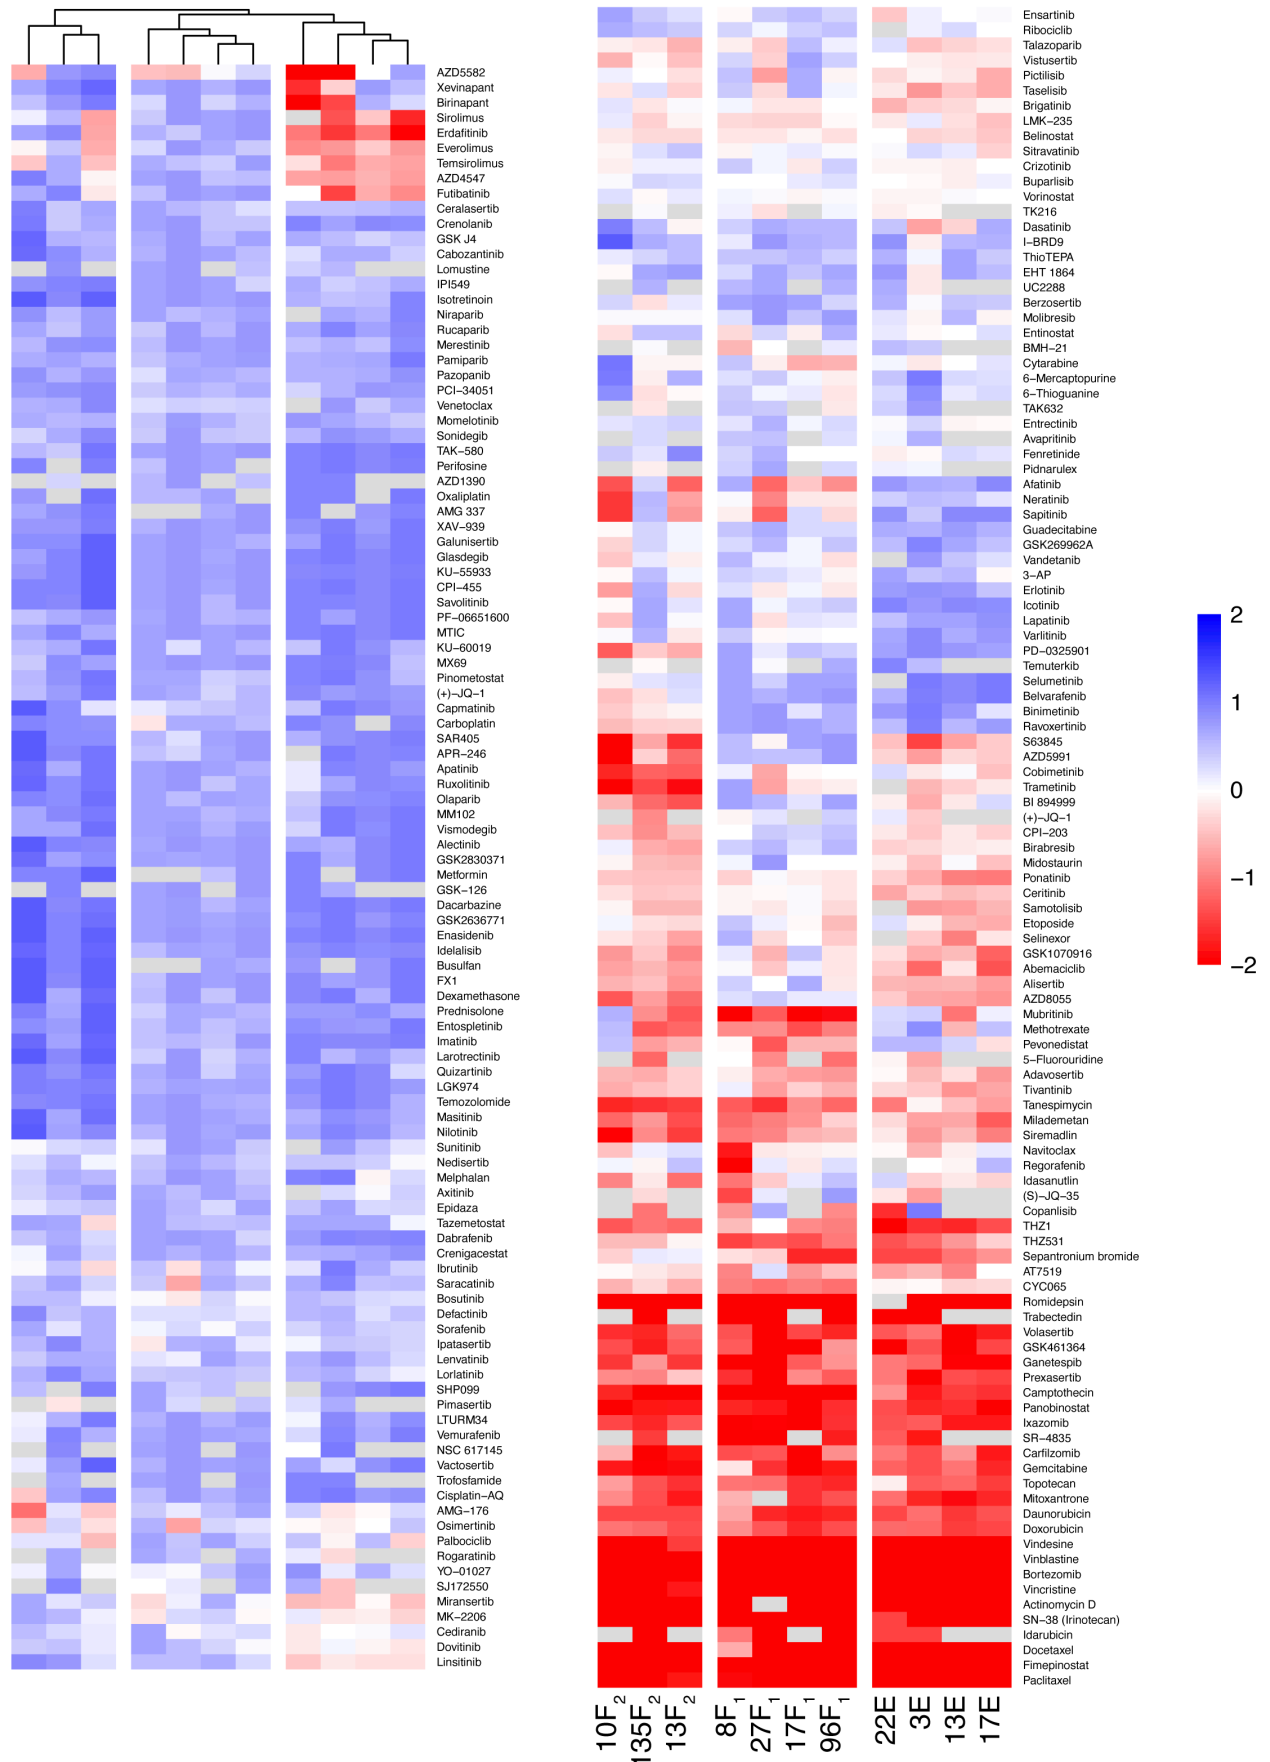

Supplementary Figure 6. High-throughput drug screening of hepatoblastoma organoids.

(a) Scaled, clustered heatmap showing AUC values for dose response curves for all compounds tested.



b

## Organoid drug screen dose-response curves

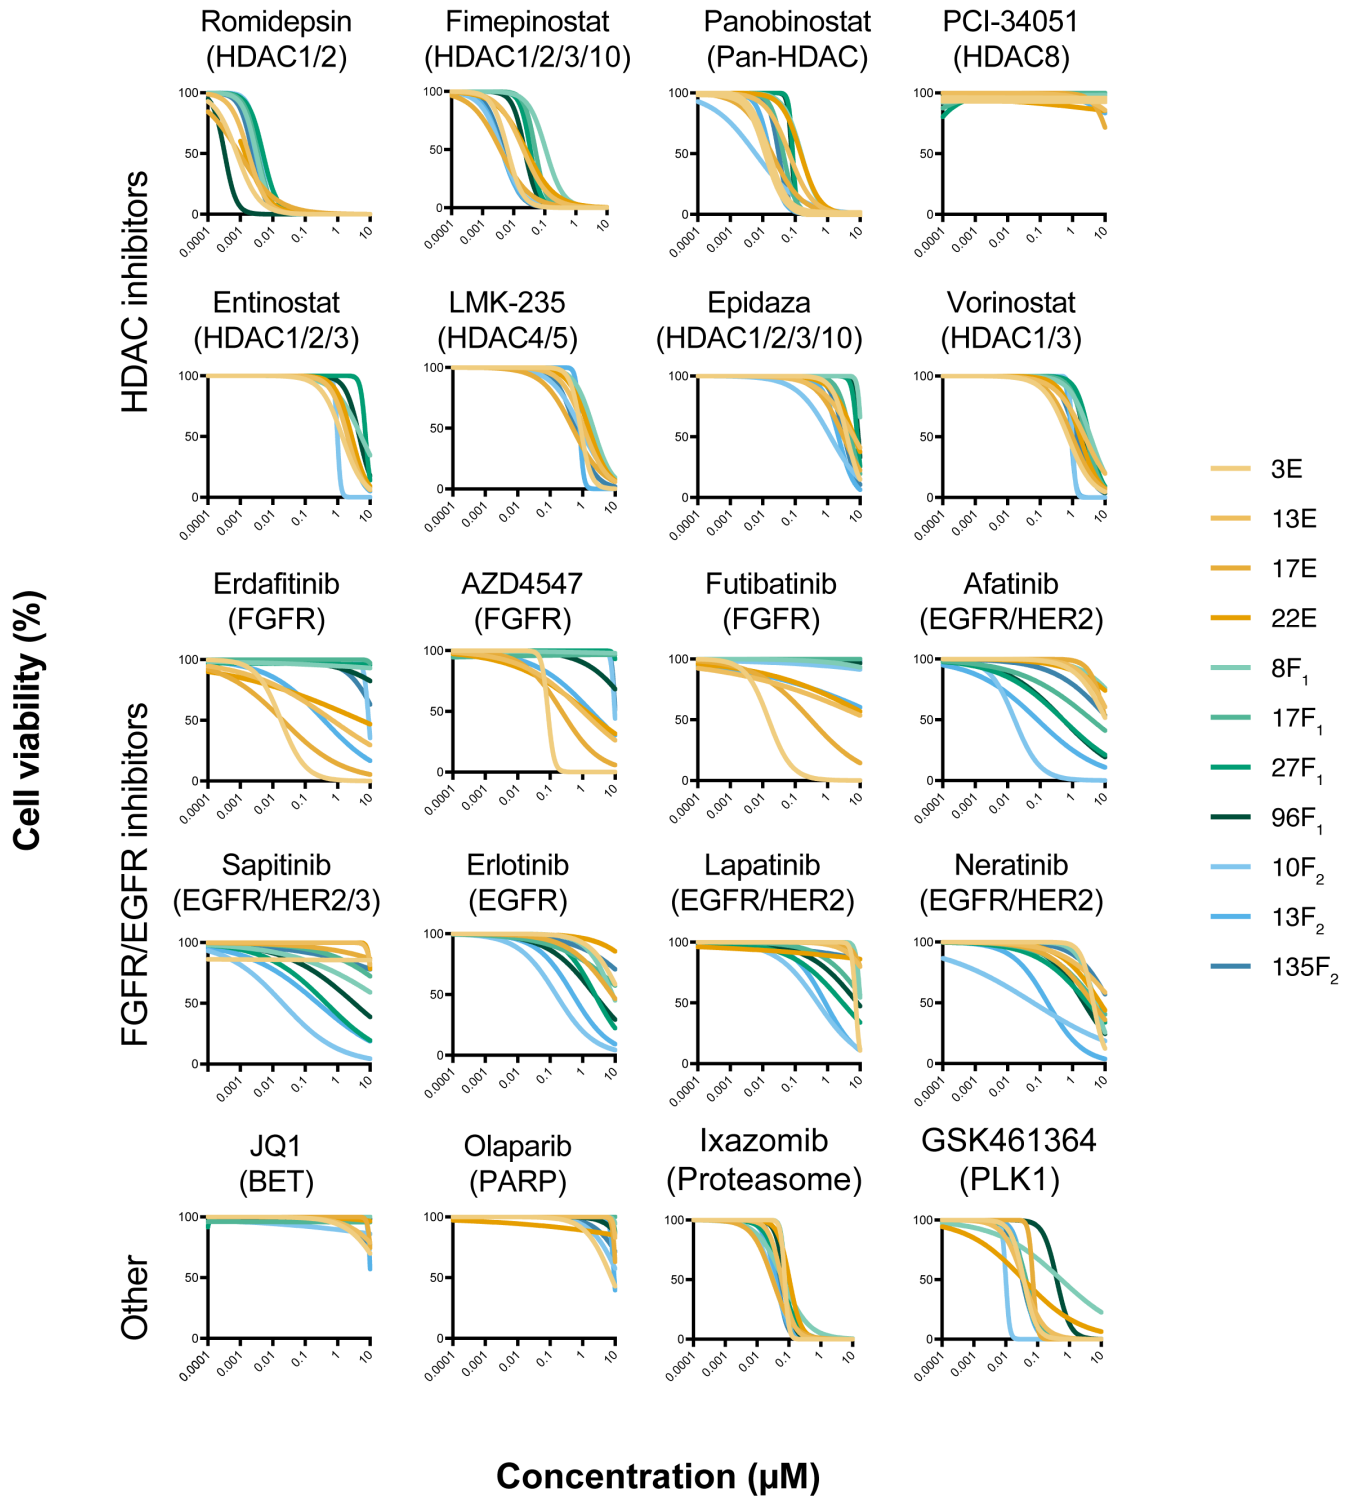

(b) Drug screening dose response curves for selected HDAC inhibitors (top), selected FGFR and EGFR inhibitors (middle) and other selected drugs (bottom).

c

## HDAC expression

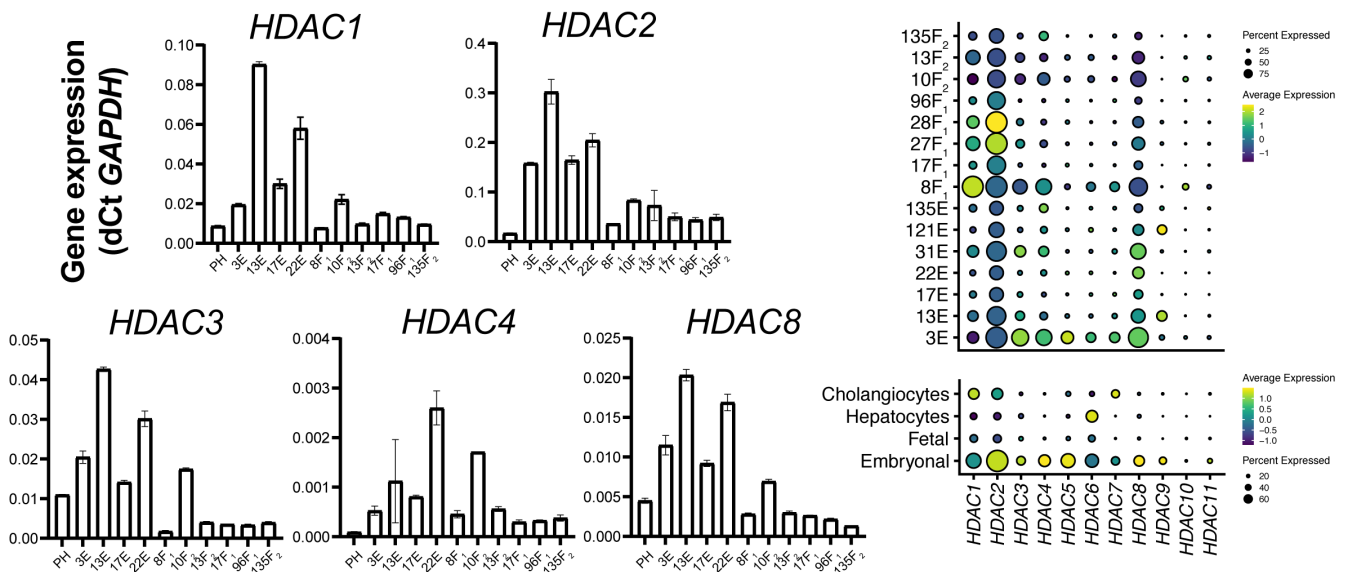

d

## Organoid growth factor dependency

Culture organoids for at least 2 weeks, with and without EGF or FGF10 → Measure viability by CCK-8 assay

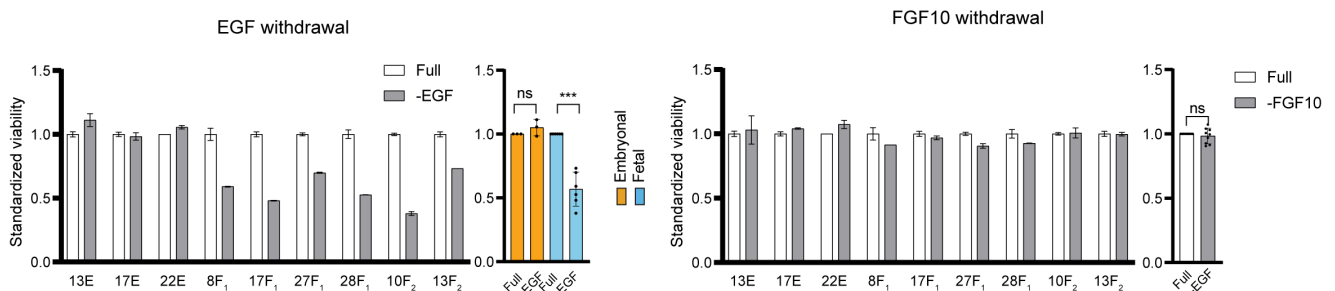

(c) qRT-PCR graphs showing expression of *HDAC* genes in different organoid models normalized against *GAPDH* (left). Error bars represent standard deviations for technical duplicates. Dot plots showing expression of all *HDAC* genes in organoids and tissues as measured by scRNA-seq (right).

(d) Organoid growth factor dependency per model and subgroup. Experimental setup (top) and viability assays (bottom). Error bars of single models represent standard deviations for technical duplicates. Statistical data between groups are presented as mean values with standard deviations. Statistical significance was determined using a paired two-sided t-test. \*\*\* $p < 0.001$ ; ns, not significant.

e

## Immunofluorescence staining of EGFR and HNF4A in tissues

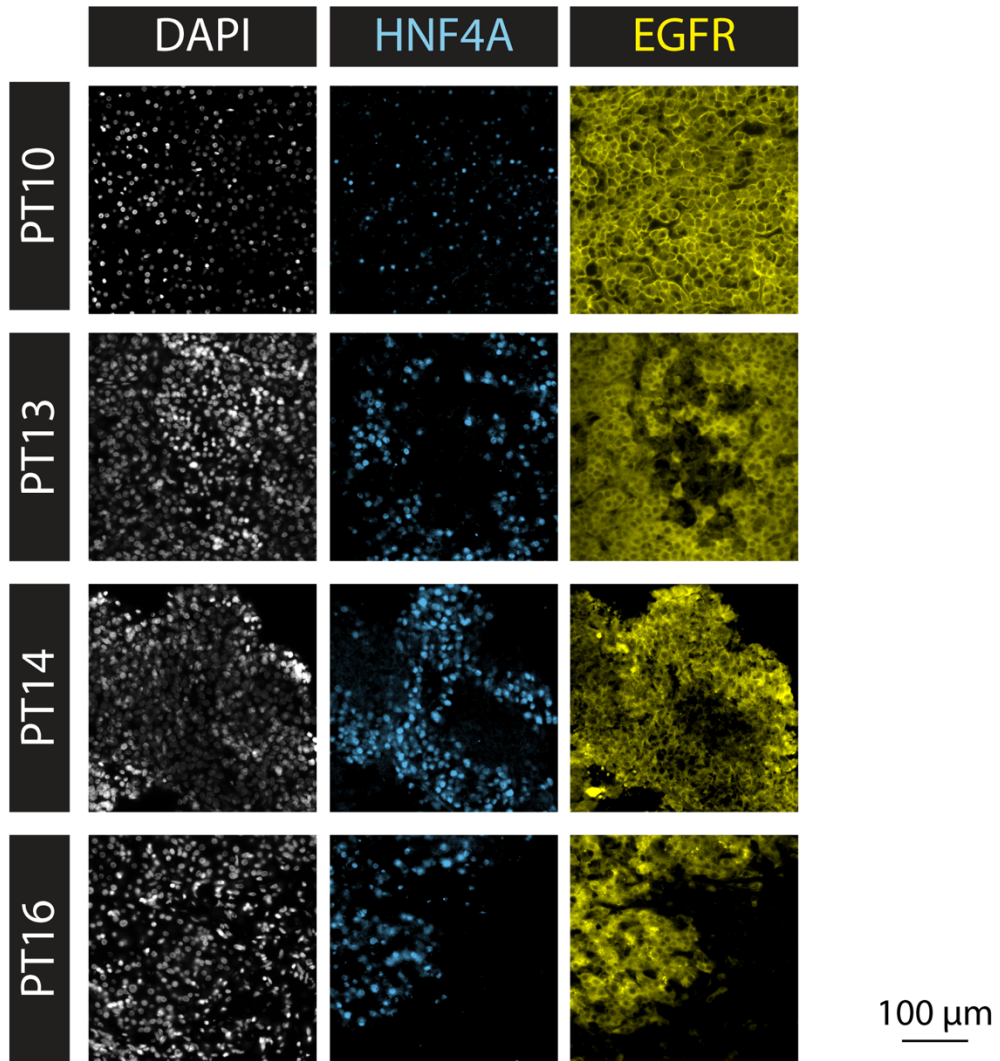

f

## FGF receptor and ligand expression

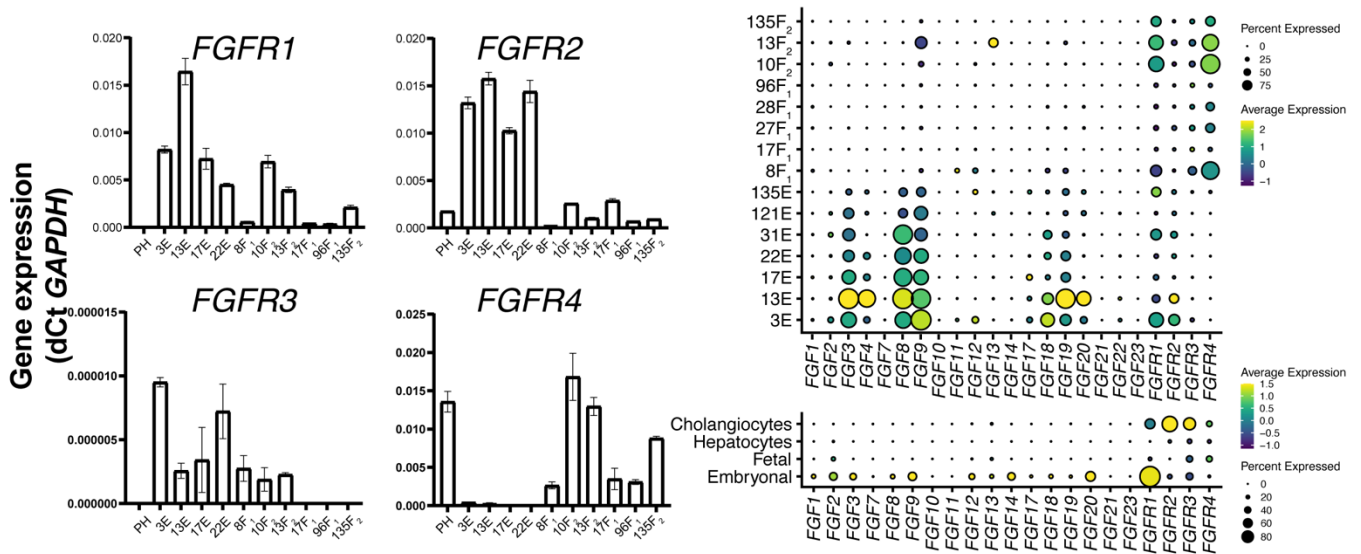

(e) Immunofluorescence co-staining of EGFR and HNF4A in selected tissues, showing EGFR expression in HNF4A<sup>+</sup> regions.

(f) qRT-PCR graphs showing expression of *FGFR* genes in different organoid models normalized against *GAPDH* (left). Error bars represent standard deviations for technical duplicates. Dot plots showing expression of all *HDAC* genes in organoids and tissues as measured by scRNA-seq (right).

g

## Effect of erdafitinib (FGFRi) with and without FGF10 in the medium

Culture organoids for at least 2 weeks, with and without FGF10

Culture for 5 days with different concentrations of erdafitinib

Measure viability by CCK-8 assay

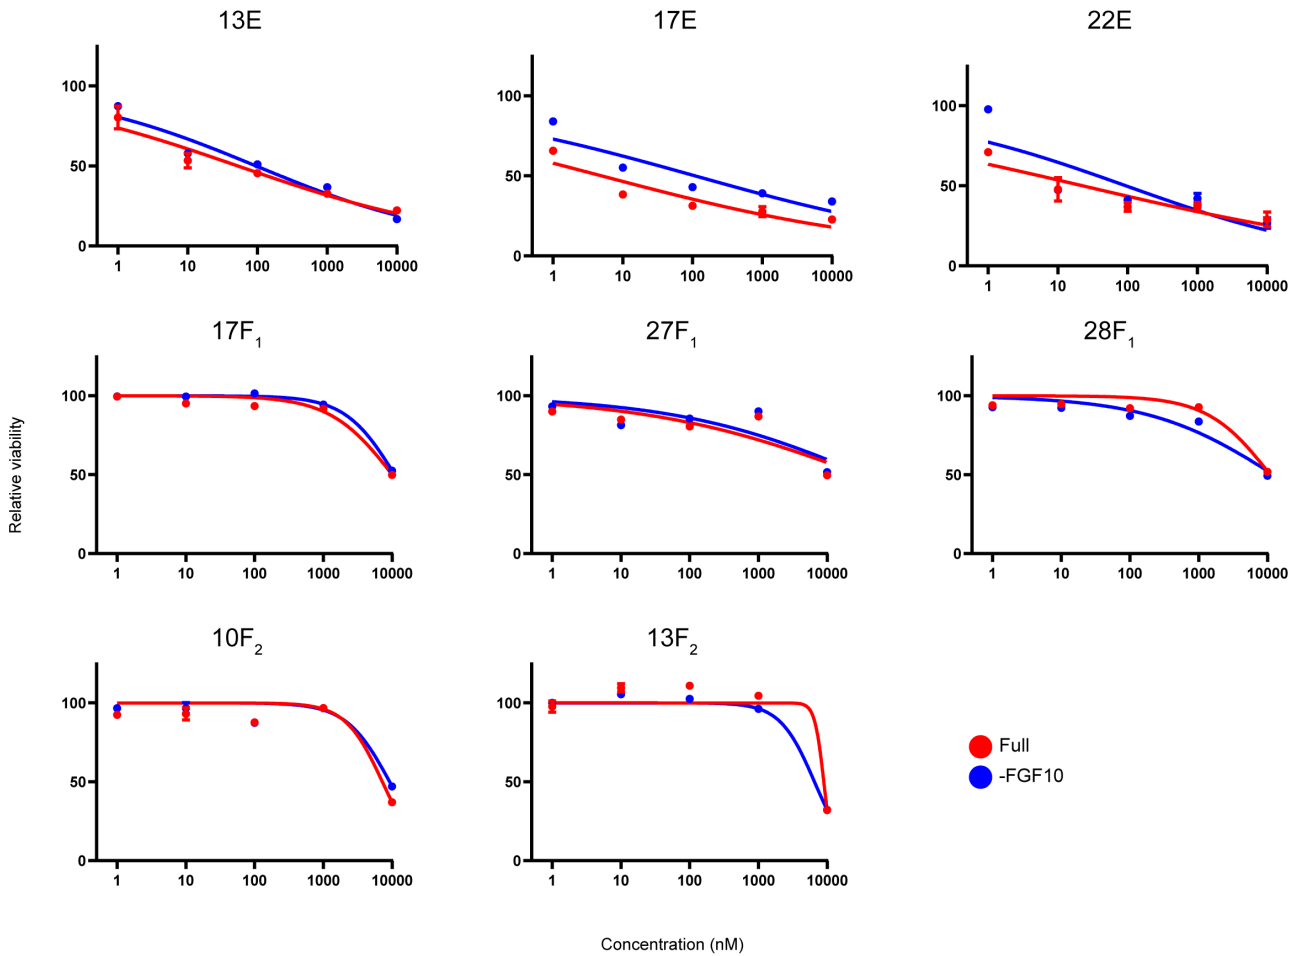

h

IC50s and viability percentages at 10  $\mu$ M of select drugs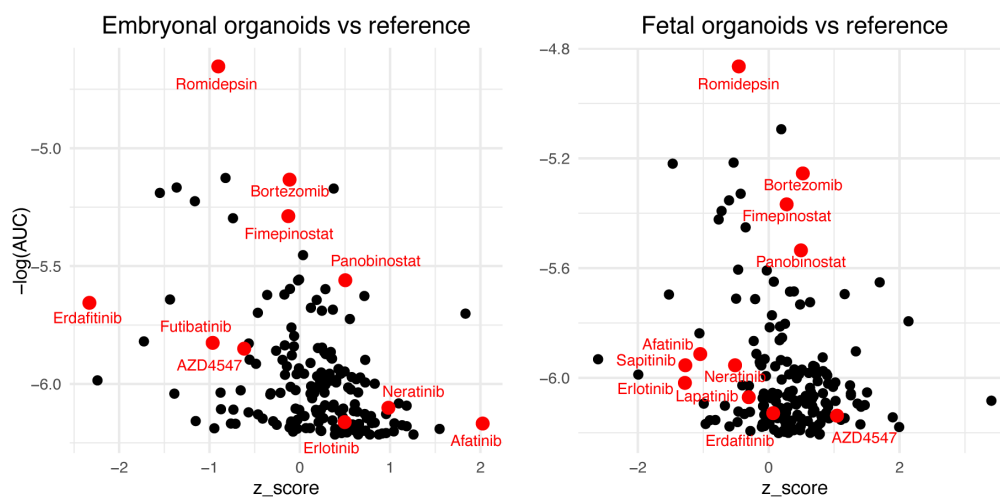

(g) Effect of erdafitinib with and without FGF10 supplemented in culture medium. Experimental setup (top). Dose response curves (bottom). Average values are plotted of technical duplicates, with error bars representing standard deviations.

(h) Hepatoblastoma organoid drug responses compared to the pediatric tumor reference cohort. Volcano plots showing the z-scores of fetal and embryonic drug responses (AUC values) versus the pediatric tumor organoid reference cohort. Lower z-scores indicate more specific sensitivity for hepatoblastoma organoids. On the y-axis, the negative logarithm of the average AUC value for the respective hepatoblastoma organoids is plotted. Only drugs with IC<sub>50</sub> values are shown.

Source data are provided as a Source Data file.

**Supplementary Table 1. Overview of hepatoblastoma patients, tissues and organoid models described in this study.**

| Patient characteristics |              |      |     | Genetics tumor biopsy |                      | Tissue characteristics |                           |            | Tissue experiments |       |         | Organoid experiments |                     |       |       |        |         |                 |  |
|-------------------------|--------------|------|-----|-----------------------|----------------------|------------------------|---------------------------|------------|--------------------|-------|---------|----------------------|---------------------|-------|-------|--------|---------|-----------------|--|
| Patient                 | Risk         | Age  | Sex | PRE TEXT              | CTNNB1 (tumor AF%)   | cnLOH 11p15            | Material                  | Treatment  | Histology          | scRNA | Spatial | IF                   | ID                  | scRNA | snRNA | Screen | Medium  | CTNNB1 mutation |  |
| PT2                     | High         | 2-8y | M   |                       | Exon 3 del           | UNK                    | Resection                 | Post-chemo | Predominant F      |       | Yes     |                      |                     |       |       |        |         |                 |  |
| PT3                     | High         | <2y  | F   | II                    | p.T41A (36%)         | No                     | Biopsy                    | Pre-chemo  | Mixed F/E          |       |         |                      | 3E                  | Yes   | Yes   | Yes    | Full    | Matching        |  |
| PT8                     | Low          | <2y  | F   | II                    | Exon 3 del           | No                     | Biopsy                    | Pre-chemo  | Predominant F      |       |         |                      | 8F <sub>1</sub>     | Yes   | Yes   | Yes    | Full    | Matching        |  |
| PT9                     | High         | <2y  | M   | III                   | p.G34V (39%)         | UNK                    | Biopsy                    | Pre-chemo  | Mixed F/E/M        |       |         | Yes                  |                     |       |       |        |         |                 |  |
|                         |              |      |     |                       |                      |                        | Resection                 | Post-chemo | Mixed F/M          | Yes   |         | Yes                  |                     |       |       |        |         |                 |  |
| PT10                    | Intermediate | <2y  | F   | III                   | Exon 3 del           | No                     | Biopsy                    | Pre-chemo  | Predominant F      |       |         | Yes                  | 10F <sub>2</sub>    | Yes   | Yes   | Yes    | Full    | Matching        |  |
| PT13                    | Very low     | <2y  | M   | II                    | p.D32N (40%)         | Yes                    | Biopsy                    | Pre-chemo  | Mixed F/E          |       |         |                      | 13F <sub>2</sub>    | Yes   | Yes   | Yes    | Full    | Matching        |  |
|                         |              |      |     |                       |                      |                        | Resection                 | Pre-chemo  | Mixed F/E          | Yes   | Yes     | Yes                  | 13E                 | Yes   | Yes   | Yes    | Full    | UNK             |  |
| PT14                    | Intermediate | 2-8y | F   | IV                    | p.S23_G34del (31%)   | Yes                    | Biopsy                    | Pre-chemo  | Mixed F/E          |       |         | Yes                  |                     |       |       |        |         |                 |  |
|                         |              |      |     |                       |                      |                        | Resection                 | Post-chemo | Predominant F      |       | Yes     |                      |                     |       |       |        |         |                 |  |
| PT15                    | High         | 2-8y | M   | IV                    | p.S29F; p.D32Y (37%) | No                     | Biopsy                    | Pre-chemo  | Predominant F      |       |         | Yes                  |                     |       |       |        |         |                 |  |
|                         |              |      |     |                       |                      |                        | Resection                 | Post-chemo | Predominant F      |       |         | Yes                  |                     |       |       |        |         |                 |  |
| PT16                    | Intermediate | <2y  | M   | II                    | Exon 3 del           | UNK                    | Resection                 | Post-chemo | Mixed F/E          |       | Yes     | Yes                  |                     |       |       |        |         |                 |  |
| PT17                    | High         | <2y  | F   | II                    | p.V22_Q78delinsE     | Yes                    | Biopsy                    | Pre-chemo  | Mixed F/E          |       |         | Yes                  | 17E                 | Yes   | Yes   | Yes    | Full    | Matching        |  |
|                         |              |      |     |                       |                      |                        | Resection                 | Post-chemo | Mixed F/E/M        |       |         | Yes                  | 17F <sub>1</sub>    | Yes   |       | Yes    | Reduced | Matching        |  |
| PT20                    | High         | 2-8y | M   | IV                    | Exon 3 del           | No                     | Biopsy                    | Pre-chemo  | Predominant F      |       |         | Yes                  |                     |       |       |        |         |                 |  |
| PT22                    | Intermediate | <2y  | F   | I                     | Exon 3 del           | No                     | Biopsy                    | Pre-chemo  | Mixed F/E          |       |         | Yes                  | 22E                 | Yes   |       | Yes    | Full    | Matching        |  |
| PT27                    | High         | 2-8y | M   | IV                    | Exon 3 del           | UNK                    | Biopsy                    | Pre-chemo  | Predominant E      |       |         |                      | 27F <sub>1</sub>    | No    |       | Yes    | Reduced | Matching        |  |
| PT28                    | Low          | <2y  | M   | III                   | UNK                  | UNK                    | Biopsy                    | Pre-chemo  | Mixed F/E          |       |         | Yes                  | 28F <sub>1</sub>    | Yes   |       |        | Reduced | Matching        |  |
| PT31                    | Intermediate | <2y  | F   | II                    | UNK                  | UNK                    | Biopsy                    | Pre-chemo  | Mixed F/E          |       |         |                      | 31E                 | Yes   |       |        | Full    | UNK             |  |
| PT96                    | UNK          | UNK  | M*  | UNK                   | UNK                  | UNK                    | Resection                 | Post-chemo | UNK                |       |         |                      | 96F <sub>1</sub>    | Yes   | Yes   | Yes    | Reduced | Exon 3 del      |  |
| PT121                   | UNK          | UNK  | F*  | UNK                   | UNK                  | UNK                    | Relapse (lung metastasis) | Post-chemo | UNK                |       |         |                      | 121E                | Yes   |       |        | Full    | p.D32N          |  |
| PT135                   | UNK          | UNK  | M*  | UNK                   | UNK                  | UNK                    | Relapse                   | Post-chemo | UNK                |       |         |                      | 135E/F <sub>2</sub> | Yes   |       | Yes    | Full    | p.S29F; p.D32Y  |  |

Notes: cnLOH 11p15 = copy neutral loss of heterozygosity of chr11p15.5; UNK = Unknown; F = fetal, E = embryonal, M = mesenchymal; asterisks (\*) indicates sex imputed based on organoid scRNA-seq analysis. \*\*Tumor origin of the organoids was confirmed based on CTNNB1 mutation (Sanger sequencing) or expression of truncated β-catenin protein (western blotting). Viably frozen tumor samples PT96, PT121 and PT135 were obtained from an external source and no matching FFPE tissues were available for these samples.

**Supplementary Table 2. IC50s and viability percentages at 10  $\mu$ M of select drugs.**

|              | IC50 E ( $\mu$ M) | IC50 F ( $\mu$ M) | Endpoint E (%) | Endpoint F (%) |
|--------------|-------------------|-------------------|----------------|----------------|
| Romidepsin   | 0.001 $\pm$ 0.000 | 0.003 $\pm$ 0.001 | 2 $\pm$ 3      | 2 $\pm$ 2      |
| Fimepinostat | 0.013 $\pm$ 0.010 | 0.032 $\pm$ 0.037 | 4 $\pm$ 2      | 4 $\pm$ 1      |
| Panobinostat | 0.062 $\pm$ 0.063 | 0.059 $\pm$ 0.051 | 6 $\pm$ 2      | 5 $\pm$ 2      |
| Volasertib   | 0.053 $\pm$ 0.014 | 0.084 $\pm$ 0.078 | 3 $\pm$ 2      | 13 $\pm$ 17    |
| Bortezomib   | 0.007 $\pm$ 0.001 | 0.018 $\pm$ 0.025 | 5 $\pm$ 2      | 4 $\pm$ 2      |
| AZD4547      | 0.653 $\pm$ 0.588 | >10               | 17 $\pm$ 10    | 68 $\pm$ 29    |
| Erdafatinib  | 1.520 $\pm$ 2.571 | >10               | 21 $\pm$ 22    | 67 $\pm$ 34    |
| Afatinib     | >10               | >10               | 60 $\pm$ 11    | 33 $\pm$ 25    |
| Sapitinib    | >10               | >10               | 81 $\pm$ 10    | 47 $\pm$ 25    |
| Erlotinib    | >10               | >10               | 66 $\pm$ 16    | 36 $\pm$ 23    |
| Lapatinib    | >10               | >10               | 63 $\pm$ 33    | 42 $\pm$ 29    |
| Neratinib    | 8.435 $\pm$ 6.676 | 4.247 $\pm$ 4.794 | 38 $\pm$ 19    | 29 $\pm$ 21    |

Notes: Average IC50 values and endpoint viability percentages for all tested FGFR and EGFR inhibitors,  $\pm$  standard deviation.

**Supplementary Table 3. Reference cohort drug screening.**

| <b>Sample ID</b> | <b>Diagnosis group</b>   | <b>Research group</b> |
|------------------|--------------------------|-----------------------|
| 01-017           | Neuroblastoma            | Molenaar              |
| RMS109           | Rhabdomyosarcoma         | Drost                 |
| JD62T            | Wilms Tumor              | Drost                 |
| RMS110           | Rhabdomyosarcoma         | Drost                 |
| RMS000HQC        | Rhabdomyosarcoma         | Drost                 |
| RMS000FLV        | Rhabdomyosarcoma         | Drost                 |
| MRT_JD81T        | Malignant Rhabdoid Tumor | Drost                 |
| RMS000HWQ        | Rhabdomyosarcoma         | Drost                 |
| AMC753           | Neuroblastoma            | Molenaar              |
| RMS007           | Rhabdomyosarcoma         | Drost                 |
| RMS000EEC        | Rhabdomyosarcoma         | Drost                 |
| RWT_119T         | Wilms Tumor              | Drost                 |
| RWT_77T          | Wilms Tumor              | Drost                 |
| 01-182           | Neuroblastoma            | Molenaar              |
| ES-046           | Ewing Sarcoma            | Clevers               |
| AMC717           | Neuroblastoma            | Molenaar              |
| ES-041           | Ewing Sarcoma            | Clevers               |
| OVT-054          | DSCRT                    | Clevers               |
| 2.0_066          | Neuroblastoma            | Molenaar              |
| 2.0_072          | Neuroblastoma            | Molenaar              |
| RWT_117T         | Wilms Tumor              | Drost                 |
| 2.0_093          | Neuroblastoma            | Molenaar              |
| JD104T           | Wilms Tumor              | Drost                 |
| RWT_125T         | Wilms Tumor              | Drost                 |
| RWT_126T         | Wilms Tumor              | Drost                 |
| RWT_136T         | Wilms Tumor              | Drost                 |
| RWT_123T         | Wilms Tumor              | Drost                 |

**Supplementary Table 4. Organoid passage numbers**

| Line | scRNA-seq | snRNA-seq | IF staining | Drug screen |
|------|-----------|-----------|-------------|-------------|
| 3E   | 5         | 9         | 10          | 6           |
| 8F1  | 4         | 10        | 4           | 4           |
| 10F2 | 7         | 7         | 6           | 9           |
| 13F2 | 8 & 20    | 8         | 6           | 11          |
| 13E  | 3         | 11        | 8           | 7           |
| 17E  | 3         | 10        | 5           | 3           |
| 17F1 | 2         | NA        | 3           | 6           |
| 22E  | 5         | NA        | 4           | 4           |
| 27F1 | 4         | NA        | 4           | 3           |
| 28F1 | 4         | NA        | 3           | NA          |
| 31E  | 3         | NA        | NA          | NA          |
| 96F1 | 4         | 0         | 2           | 3           |
| 121E | 3         | NA        | 2           | NA          |
| 135  | 4         | NA        | NA          | 4           |



**Supplementary Table 5. Primary antibodies.**

| <b>Target</b> | <b>Supplier</b>            | <b>Dilution</b> |
|---------------|----------------------------|-----------------|
| HNF4A         | MA1-199 (Thermo Fisher)    | 1:50            |
|               | sc-8987 (Santa Cruz)       | 1:50            |
| b-catenin     | 610154 (BD Bioscience)     | 1:100           |
|               | 8480 (Cell Signaling Tech) | 1:100           |
| LEF1          | 2230 (Cell Signaling Tech) | 1:100           |
| EGFR          | 4267 (Cell Signaling Tech) | 1:100           |

**Supplementary Table 6. Primer sequencing.**

| <b>Assay</b>      | <b>Primer</b>        | <b>Primer sequence</b>   |
|-------------------|----------------------|--------------------------|
| Sanger sequencing | CTNNB1_ Ex3_ Forward | AGCGTGGACAATGGCTACTCAA   |
| Sanger sequencing | CTNNB1_ Ex3_ Reverse | ACCTGGTCCTCGTCATTTAGCAGT |
| qRT-PCR           | GAPDH Forward        | CCACCTTTGACGCTGGG        |
| qRT-PCR           | GAPDH Reverse        | CATACCAGGAAATGAGCTTGACA  |
| qRT-PCR           | HDAC1 Forward        | CTACTACGACGGGGATGTTG     |
| qRT-PCR           | HDAC1 Reverse        | GAGTCATGCGGATTCGGTGAG    |
| qRT-PCR           | HDAC2 Forward        | AATCCGTAATGTTGCTCGA      |
| qRT-PCR           | HDAC2 Reverse        | CATTATATGGCAACTCATTGGG   |
| qRT-PCR           | HDAC3 Forward        | CCTGGCATTGACCCATAGCC     |
| qRT-PCR           | HDAC3 Reverse        | CTCTTGGTGAAGCCTTGATA     |
| qRT-PCR           | HDAC4 Forward        | CGGTCCTGGGAATGTACGAC     |
| qRT-PCR           | HDAC4 Reverse        | GGCCACTTTCTGCTTTAGCCT    |
| qRT-PCR           | HDAC8 Forward        | TCGCTGGTCCCGGTTTATATC    |
| qRT-PCR           | HDAC8 Reverse        | TACTGGCCCGTTTGGGGAT      |
| qRT-PCR           | FGFR1 Forward        | GAGCCTTGTCACCAACCTCTAAC  |
| qRT-PCR           | FGFR1 Reverse        | CCCAGGGCTGGGCTTGTT       |
| qRT-PCR           | FGFR2 Forward        | GCCGTGAAGATGTTGAAAGATGA  |
| qRT-PCR           | FGFR2 Reverse        | GTGTGCAGGCTCCAAGAAGA     |
| qRT-PCR           | FGFR3 Forward        | GGTCGCACGGACGCA          |
| qRT-PCR           | FGFR3 Reverse        | GCTCGGGAGACTGGCG         |
| qRT-PCR           | FGFR4 Forward        | TATCTGGAGTCCCGGAAGTGTATC |
| qRT-PCR           | FGFR4 Reverse        | CAGCCCAAAGTCAGCAATCTTC   |
